# Supplementary material for: Incorporating individual historical controls and aggregate treatment effect estimates into a Bayesian survival trial: a simulation study
Source: PubMed Central journal article supplement (PMC6480797; doi:10.1186/s12874-019-0714-z), 2019-04-24
Supplement: 12874_2019_714_MOESM2_ESM.pdf [file 12874_2019_714_MOESM2_ESM.pdf]

## Likelihood of the distributions used

The likelihood of a Weibull proportional hazards model for the  $n$  trial subjects is written as

$$L(\beta_0, \gamma | D) = \prod_{i=1}^n \left[ \exp\{\beta_0\} \frac{1}{\gamma} t_i^{\frac{1}{\gamma}-1} \right]^{\nu_i} \exp \left\{ -\exp\{\beta_0\} t_i^{\frac{1}{\gamma}} \right\}$$

where  $\gamma$  is the scale parameter,  $\beta_0$  is the intercept,  $t = (t_1, t_2, \dots, t_n)$  represents survival times, and where  $\nu_i = 1$  if the  $i^{\text{th}}$  subject failed, and 0 if  $t_i$  did not fail.

For a piecewise exponential model, where the time axis is divided in  $J$  intervals  $(0, s_1], (s_1, s_2], \dots, (s_{j-1}, s_j]$  and where we assume constant baseline hazard ( $\lambda_j$ ) for  $t_i \in I_j = (s_{j-1}, s_j]$ , the hazard function is as follows

$$h_i(t) = \lambda_j \times \exp(\beta \times trt) \quad \text{for } s_{j-1} < t < s_j$$

The likelihood of a piecewise model for the  $n$  trial subjects is written as

$$L(\lambda | D) = \prod_{i=1}^n \prod_{j=1}^J (\lambda_j)^{\delta_{ij} \nu_i} \exp \left\{ -\delta_{ij} \left[ \lambda_j (t_i - s_{j-1}) + \sum_{g=1}^{j-1} \lambda_g (s_g - s_{g-1}) \right] \right\}$$

Letting  $\lambda_j$  with  $j = 1, \dots, J$  be the baseline hazard in each interval, and  $\delta_i = 1$  if the  $i^{\text{th}}$  subject failed or was censored in the  $j^{\text{th}}$  interval, and 0 otherwise.
