# Supplementary material for: Incorporating individual historical controls and aggregate treatment effect estimates into a Bayesian survival trial: a simulation study
Source: PubMed Central journal article supplement (PMC6480797; doi:10.1186/s12874-019-0714-z), 2019-04-24
Supplement: 12874_2019_714_MOESM3_ESM.pdf [file 12874_2019_714_MOESM3_ESM.pdf]

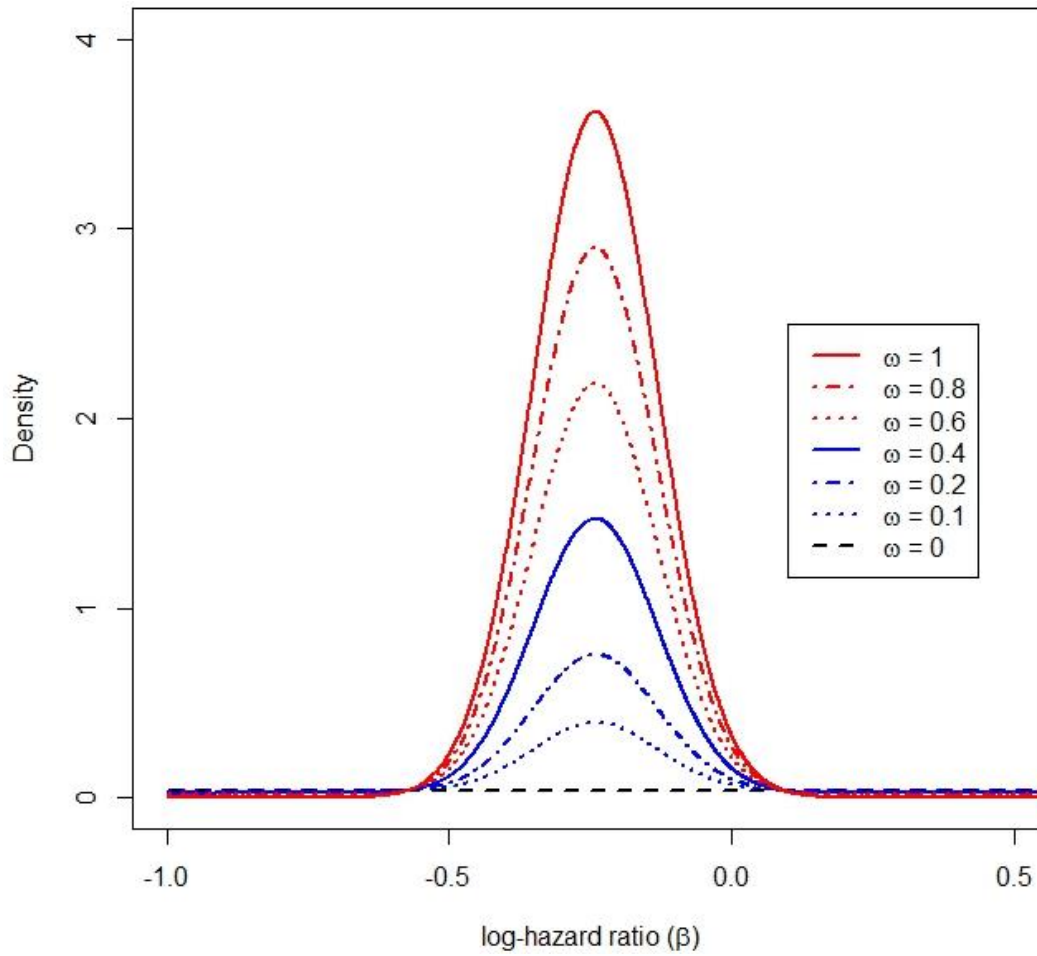

**Figure A2: Mixture prior distribution of the treatment effect for different values of  $\omega$**

Mixture prior distribution where the informative component is

$$\pi_H(\beta|D_{TE}^H) \sim N(\log(0.786), 0.012) \text{ and the vague component is } \pi_0(\beta) \sim N(0, 10)$$
