# Supplementary material for: Incorporating individual historical controls and aggregate treatment effect estimates into a Bayesian survival trial: a simulation study
Source: PubMed Central journal article supplement (PMC6480797; doi:10.1186/s12874-019-0714-z), 2019-04-24
Supplement: 12874_2019_714_MOESM6_ESM.pdf [file 12874_2019_714_MOESM6_ESM.pdf]

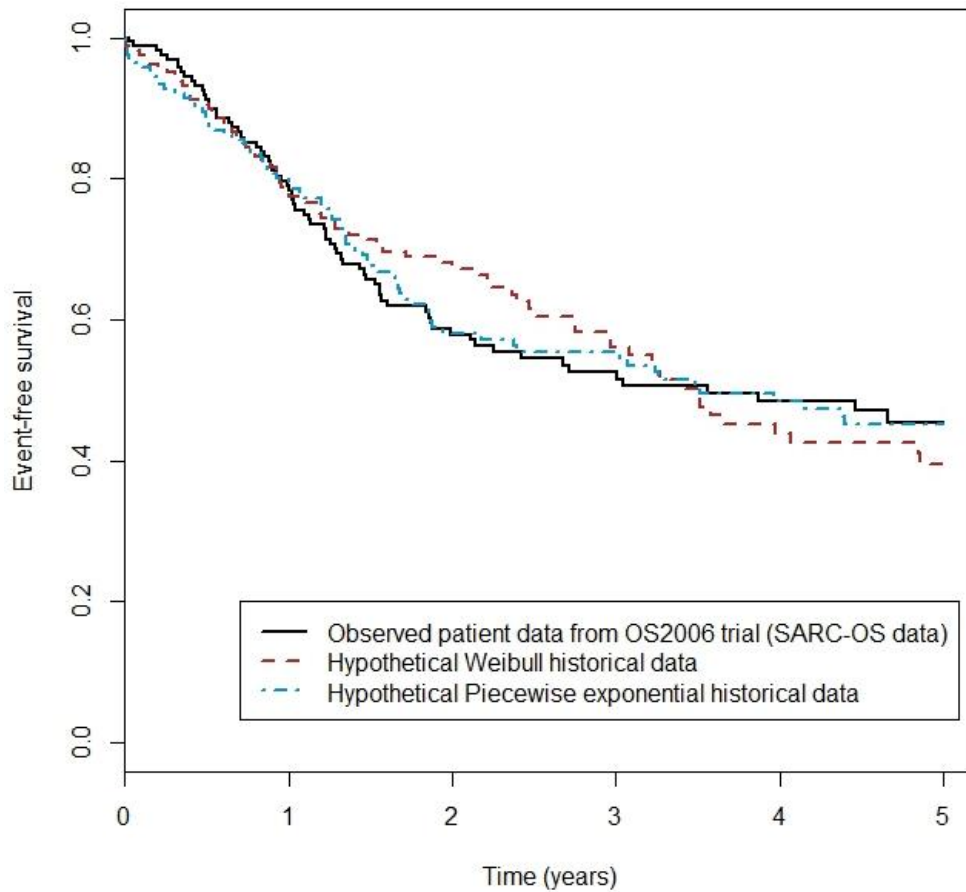

**Figure A3: Historical datasets considered in the simulation study**

Observed Kaplan-Meier curves of SARC-OS patients, that is, the subgroup of OS2006 patients satisfying the Sarcome-13 trial eligibility criteria (solid black curve), and Kaplan-Meier curves of the two hypothetical historical datasets: one simulated from a Weibull distribution (dashed brown curve) and one from a piecewise exponential distribution (dot dashed blue curve)
