# Supplementary material for: Incorporating individual historical controls and aggregate treatment effect estimates into a Bayesian survival trial: a simulation study
Source: PubMed Central journal article supplement (PMC6480797; doi:10.1186/s12874-019-0714-z), 2019-04-24

**Figure A4: Graphical representation of scenarios S1 to S12: no conflict in terms of survival distributions - Weibull survival distribution for the historical control and the new trial data.** Black curves represent the Kaplan-Meier EFS of hypothetical historical control survival data, colored curves represent EFS distribution in the control (plain line) and experimental (dashed line) arm of the new trial

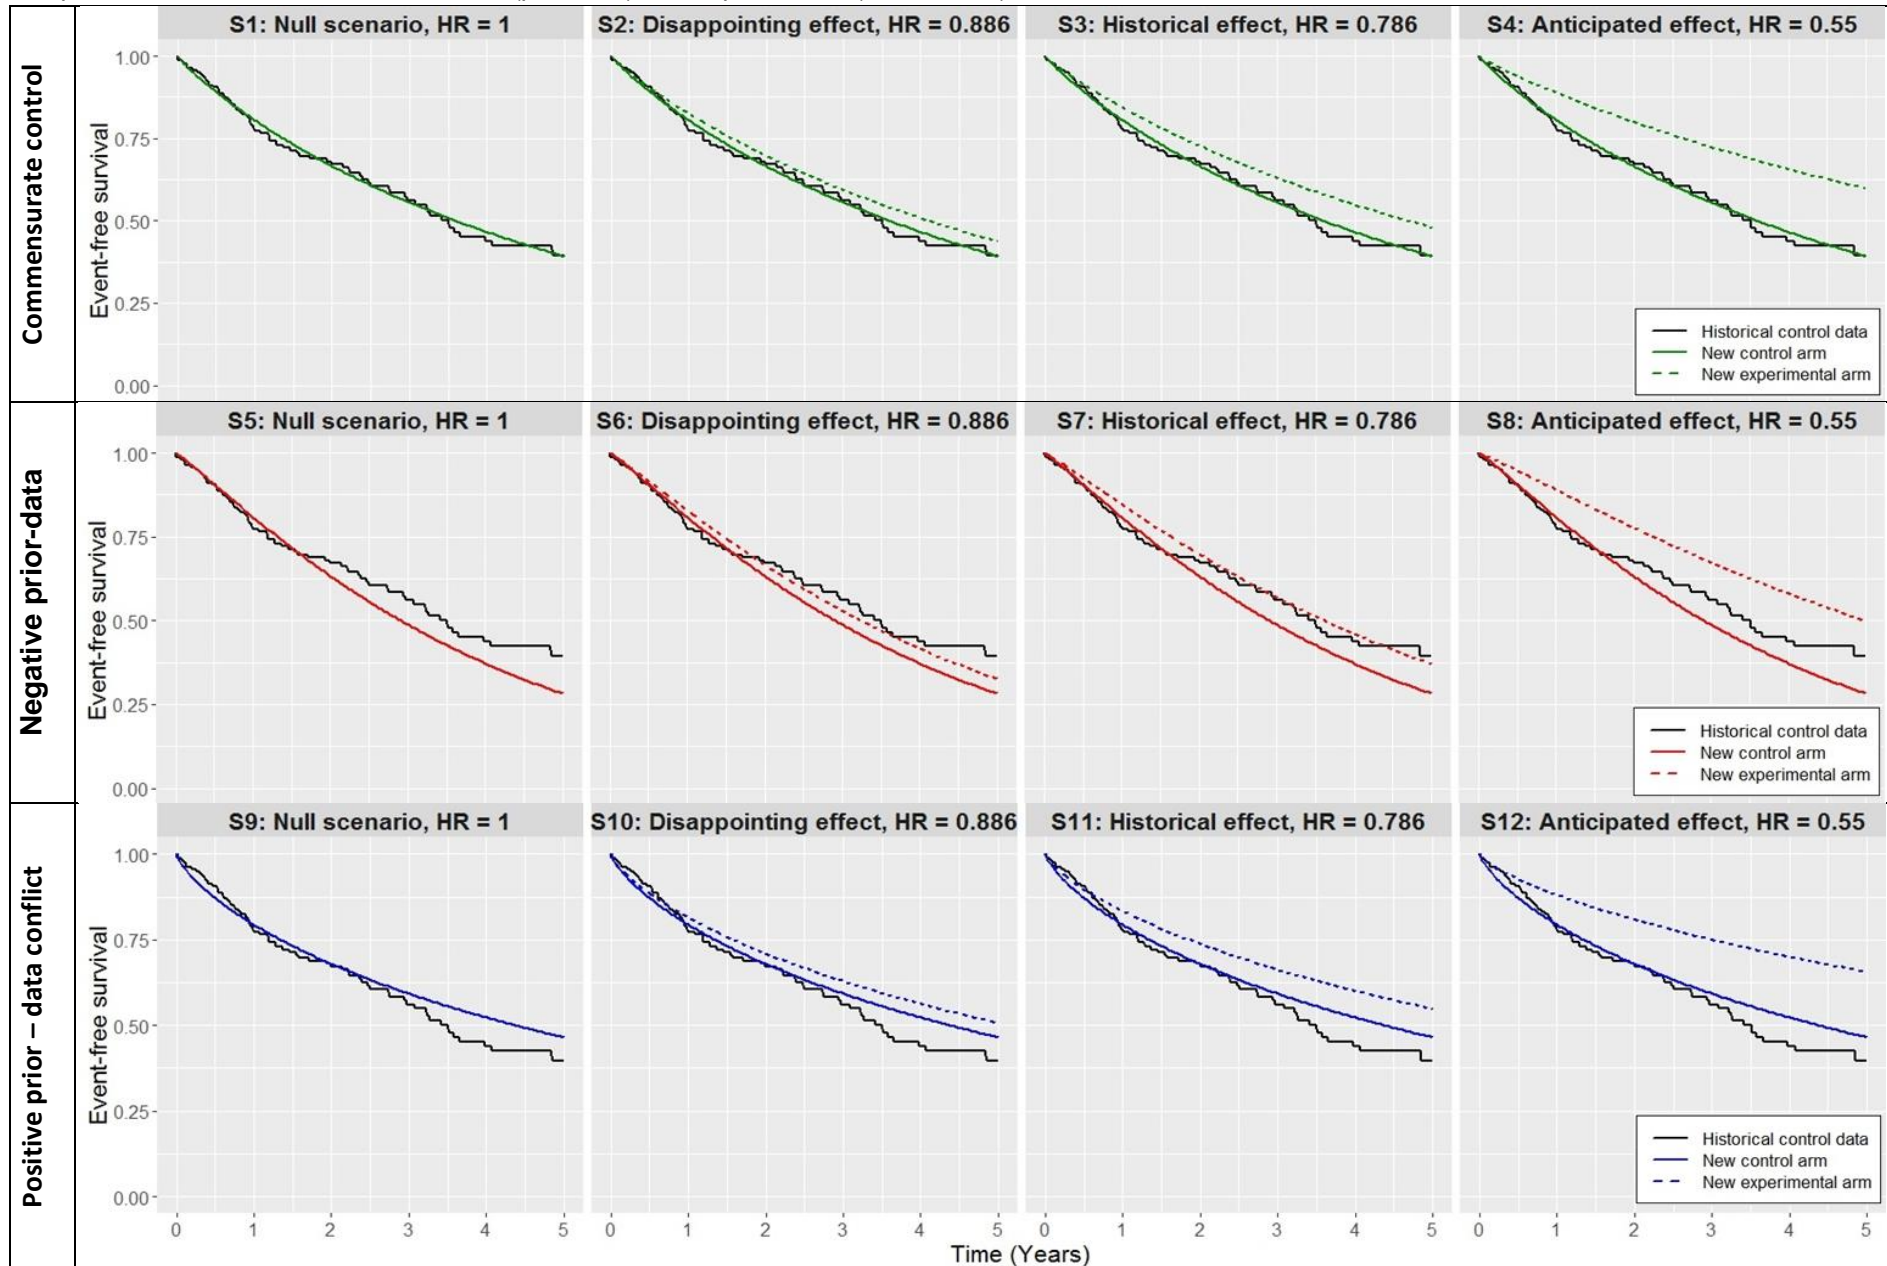

**Figure A5: Graphical representations of scenarios S13 to S24: no conflict in terms of survival distribution - Piecewise exponential survival distribution for the historical control and the new trial data.** Black curves represent the Kaplan-Meier EFS of hypothetical historical control survival data, colored curves represent EFS distribution in the control (plain line) and experimental (dashed line) arm of the new trial

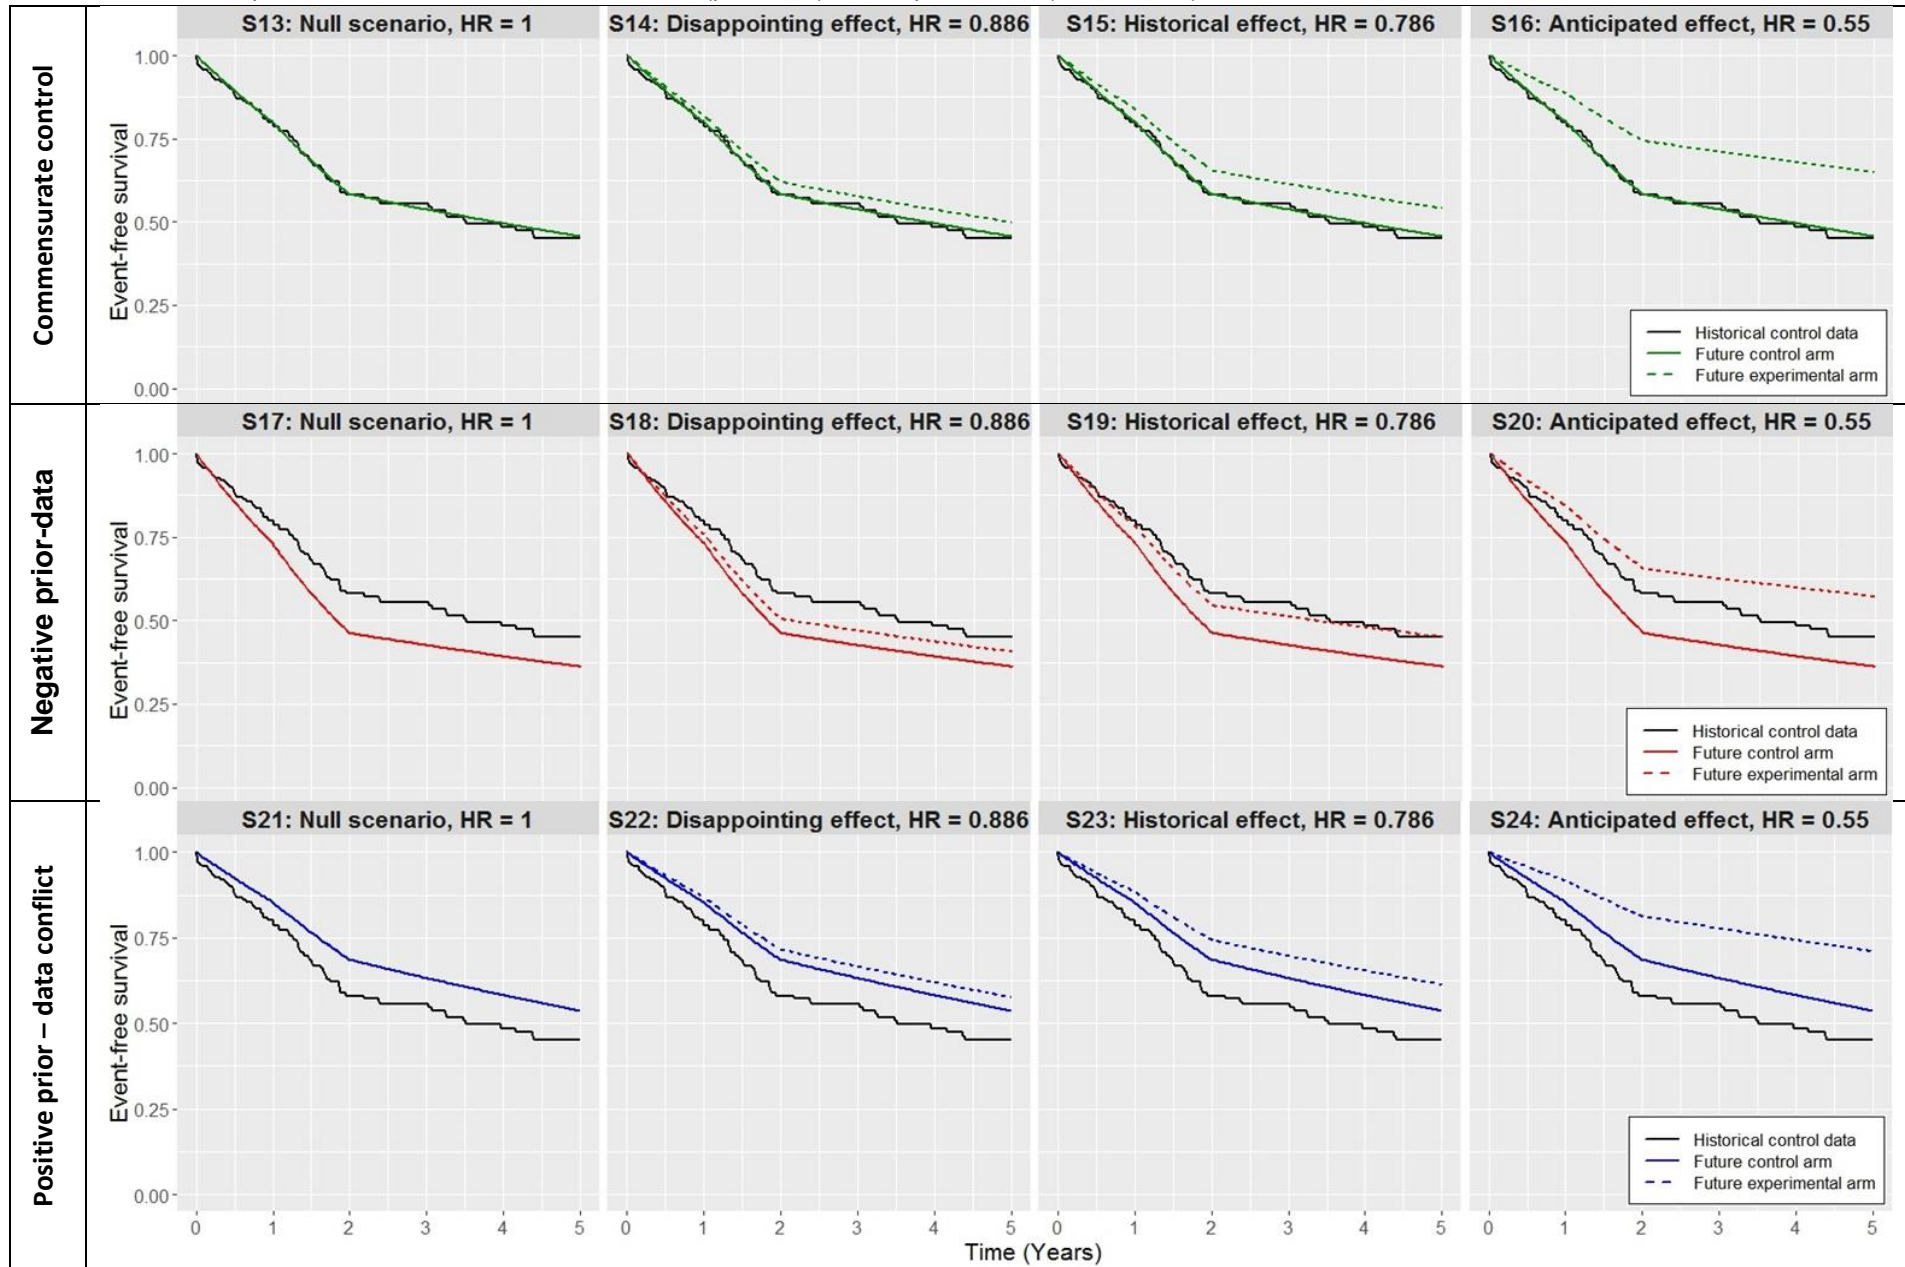

**Figure A6: Graphical representations of scenarios S25 to S32: conflict in terms of survival distribution between historical and new trial data.** Black curves represent the Kaplan-Meier EFS of hypothetical historical control survival data, colored curves represent EFS distribution in the control (plain line) and experimental (dashed line) arm of the new trial

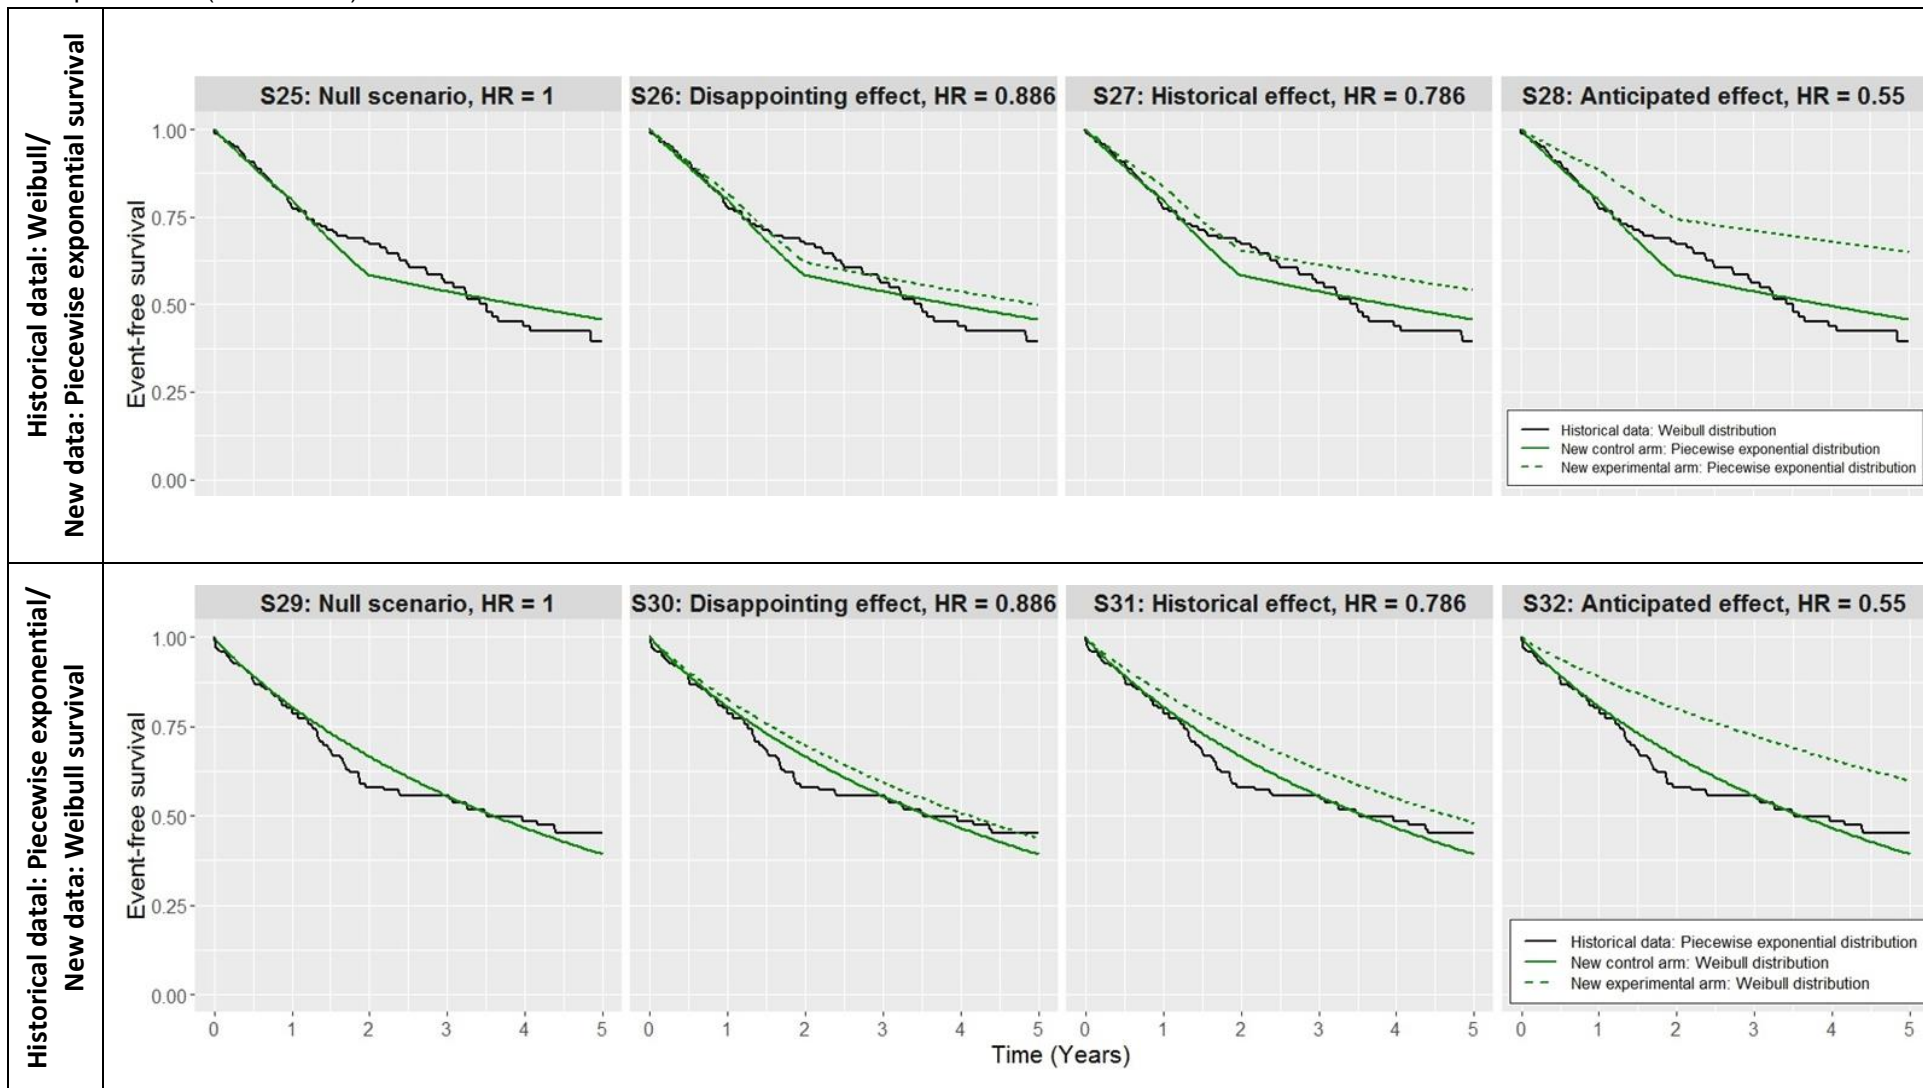

Supplement: 12874_2019_714_MOESM7_ESM.pdf [file 12874_2019_714_MOESM7_ESM.pdf]
