# Supplementary material for: Incorporating individual historical controls and aggregate treatment effect estimates into a Bayesian survival trial: a simulation study
Source: PubMed Central journal article supplement (PMC6480797; doi:10.1186/s12874-019-0714-z), 2019-04-24
Supplement: 12874_2019_714_MOESM8_ESM.pdf [file 12874_2019_714_MOESM8_ESM.pdf]

**Table A1. Impact of  $\alpha_0$  and  $\omega$  on the operating characteristics and the estimated performance for scenarios S1 to S4 (Weibull distribution for historical and new data, commensurate control arm), with  $\sigma_H^2$  equivalent to 329 events.**

| Commensurate control arm |               |                             |         |       |       |                                                 |         |       |       |                                              |         |       |       |                                              |         |       |       |
|--------------------------|---------------|-----------------------------|---------|-------|-------|-------------------------------------------------|---------|-------|-------|----------------------------------------------|---------|-------|-------|----------------------------------------------|---------|-------|-------|
| Treatment effect         |               | S1: Null scenario<br>HR = 1 |         |       |       | S2: Disappointing effect scenario<br>HR = 0.886 |         |       |       | S3: Historical effect scenario<br>HR = 0.786 |         |       |       | S4: Anticipated effect scenario<br>HR = 0.55 |         |       |       |
| Parameters               |               | Bias                        | SD      | RMSE  | Alpha | Bias                                            | SD      | RMSE  | Power | Bias                                         | SD      | RMSE  | Power | Bias                                         | SD      | RMSE  | Power |
| $\alpha_0$<br>0          | $\omega$<br>0 | 0.0024                      | 0.263   | 0.262 | 0.100 | 0.0015                                          | 0.268   | 0.267 | 0.208 | 0.0022                                       | 0.275   | 0.275 | 0.359 | -0.0075                                      | 0.304   | 0.298 | 0.794 |
|                          | 0.1           | -0.0490                     | 0.240   | 0.234 | 0.216 | -0.0275                                         | 0.234   | 0.213 | 0.368 | 0.0014                                       | 0.236   | 0.210 | 0.545 | 0.0582                                       | 0.288   | 0.289 | 0.900 |
|                          | 0.2           | -0.0794                     | 0.222   | 0.223 | 0.323 | -0.0439                                         | 0.210   | 0.185 | 0.491 | 0.0008                                       | 0.210   | 0.176 | 0.655 | 0.0999                                       | 0.272   | 0.289 | 0.944 |
|                          | 0.4           | -0.1189                     | 0.195   | 0.213 | 0.499 | -0.0645                                         | 0.178   | 0.155 | 0.668 | 0.0007                                       | 0.176   | 0.132 | 0.808 | 0.1573                                       | 0.244   | 0.292 | 0.983 |
|                          | 0.6           | -0.1469                     | 0.171   | 0.210 | 0.641 | -0.0782                                         | 0.155   | 0.136 | 0.796 | 0.0007                                       | 0.152   | 0.102 | 0.893 | 0.2015                                       | 0.217   | 0.298 | 0.993 |
|                          | 0.8           | -0.1718                     | 0.147   | 0.208 | 0.780 | -0.0894                                         | 0.133   | 0.121 | 0.897 | 0.0007                                       | 0.131   | 0.074 | 0.958 | 0.2432                                       | 0.185   | 0.304 | 0.997 |
|                          | 1             | -0.2035                     | 0.105   | 0.207 | 0.969 | -0.1017                                         | 0.106   | 0.109 | 0.989 | 0.0006                                       | 0.107   | 0.039 | 0.997 | 0.3109                                       | 0.110   | 0.313 | 1     |
|                          | 0.3           | 0                           | -0.0058 | 0.232 | 0.214 | 0.084                                           | -0.0071 | 0.238 | 0.220 | 0.211                                        | -0.0070 | 0.245 | 0.231 | 0.396                                        | -0.0158 | 0.274 | 0.259 |
| 0.1                      |               | -0.0598                     | 0.213   | 0.196 | 0.204 | -0.0370                                         | 0.205   | 0.171 | 0.395 | -0.0044                                      | 0.206   | 0.170 | 0.613 | 0.0542                                       | 0.263   | 0.260 | 0.957 |
| 0.2                      |               | -0.0900                     | 0.197   | 0.191 | 0.319 | -0.0526                                         | 0.183   | 0.150 | 0.528 | -0.0029                                      | 0.183   | 0.139 | 0.721 | 0.0971                                       | 0.251   | 0.264 | 0.981 |
| 0.4                      |               | -0.1268                     | 0.174   | 0.190 | 0.499 | -0.0705                                         | 0.156   | 0.128 | 0.706 | -0.0014                                      | 0.154   | 0.103 | 0.859 | 0.1552                                       | 0.227   | 0.274 | 0.995 |
| 0.6                      |               | -0.1519                     | 0.153   | 0.192 | 0.643 | -0.0815                                         | 0.136   | 0.116 | 0.828 | -0.0009                                      | 0.134   | 0.078 | 0.929 | 0.1990                                       | 0.203   | 0.283 | 0.999 |
| 0.8                      |               | -0.1726                     | 0.133   | 0.195 | 0.784 | -0.0899                                         | 0.121   | 0.109 | 0.917 | -0.0007                                      | 0.119   | 0.058 | 0.969 | 0.2402                                       | 0.174   | 0.292 | 1     |
| 1                        |               | -0.1959                     | 0.102   | 0.200 | 0.954 | -0.0977                                         | 0.103   | 0.105 | 0.987 | -0.0006                                      | 0.103   | 0.039 | 0.997 | 0.3023                                       | 0.105   | 0.305 | 1     |
| 0.6                      |               | 0                           | -0.0095 | 0.219 | 0.200 | 0.082                                           | -0.0108 | 0.225 | 0.206 | 0.222                                        | -0.0111 | 0.233 | 0.218 | 0.418                                        | -0.0199 | 0.261 | 0.248 |
|                          | 0.1           | -0.0629                     | 0.202   | 0.186 | 0.210 | -0.0401                                         | 0.193   | 0.161 | 0.408 | -0.0066                                      | 0.195   | 0.159 | 0.625 | 0.0501                                       | 0.253   | 0.252 | 0.973 |
|                          | 0.2           | -0.0920                     | 0.187   | 0.184 | 0.321 | -0.0549                                         | 0.173   | 0.141 | 0.547 | -0.0046                                      | 0.173   | 0.130 | 0.752 | 0.0925                                       | 0.242   | 0.258 | 0.988 |
|                          | 0.4           | -0.1275                     | 0.165   | 0.185 | 0.500 | -0.0715                                         | 0.147   | 0.122 | 0.725 | -0.0023                                      | 0.146   | 0.096 | 0.877 | 0.1500                                       | 0.221   | 0.268 | 0.997 |
|                          | 0.6           | -0.1512                     | 0.147   | 0.188 | 0.644 | -0.0815                                         | 0.130   | 0.113 | 0.840 | -0.0012                                      | 0.129   | 0.074 | 0.938 | 0.1935                                       | 0.198   | 0.278 | 0.999 |
|                          | 0.8           | -0.1707                     | 0.129   | 0.191 | 0.785 | -0.0891                                         | 0.116   | 0.107 | 0.921 | -0.0008                                      | 0.115   | 0.056 | 0.971 | 0.2344                                       | 0.171   | 0.287 | 1     |
|                          | 1             | -0.1920                     | 0.101   | 0.196 | 0.944 | -0.0959                                         | 0.101   | 0.104 | 0.985 | -0.0005                                      | 0.102   | 0.040 | 0.997 | 0.2973                                       | 0.103   | 0.300 | 1     |
|                          | 1             | 0                           | -0.0121 | 0.210 | 0.193 | 0.087                                           | -0.0137 | 0.216 | 0.200 | 0.233                                        | -0.0141 | 0.223 | 0.212 | 0.448                                        | -0.0230 | 0.252 | 0.242 |
| 0.1                      |               | -0.0640                     | 0.194   | 0.182 | 0.215 | -0.0418                                         | 0.185   | 0.156 | 0.425 | -0.0086                                      | 0.187   | 0.154 | 0.653 | 0.0459                                       | 0.246   | 0.249 | 0.980 |
| 0.2                      |               | -0.0923                     | 0.180   | 0.180 | 0.325 | -0.0558                                         | 0.166   | 0.138 | 0.559 | -0.0059                                      | 0.166   | 0.126 | 0.771 | 0.0878                                       | 0.237   | 0.255 | 0.992 |
| 0.4                      |               | -0.1271                     | 0.160   | 0.182 | 0.501 | -0.0719                                         | 0.142   | 0.121 | 0.733 | -0.0030                                      | 0.141   | 0.094 | 0.884 | 0.1443                                       | 0.217   | 0.266 | 0.998 |
| 0.6                      |               | -0.1497                     | 0.143   | 0.185 | 0.641 | -0.0812                                         | 0.126   | 0.111 | 0.841 | -0.0012                                      | 0.125   | 0.072 | 0.939 | 0.1874                                       | 0.196   | 0.274 | 0.999 |
| 0.8                      |               | -0.1685                     | 0.126   | 0.189 | 0.776 | -0.0883                                         | 0.114   | 0.106 | 0.920 | -0.0009                                      | 0.113   | 0.056 | 0.973 | 0.2285                                       | 0.169   | 0.283 | 1     |
| 1                        |               | -0.1892                     | 0.099   | 0.194 | 0.933 | -0.0945                                         | 0.100   | 0.103 | 0.983 | -0.0006                                      | 0.100   | 0.042 | 0.997 | 0.2931                                       | 0.101   | 0.296 | 1     |

**Table A2. Impact of  $\alpha_0$  and  $\omega$  on the operating characteristics for scenarios S5 to S8 (Weibull distribution for historical and new data, negative prior-data conflict), with  $\sigma_H^2$  equivalent to 329 events.**

| Control arm: negative prior-data conflict |               |                             |        |       |       |                                                 |        |       |       |                                              |        |       |       |                                              |        |       |       |
|-------------------------------------------|---------------|-----------------------------|--------|-------|-------|-------------------------------------------------|--------|-------|-------|----------------------------------------------|--------|-------|-------|----------------------------------------------|--------|-------|-------|
| Treatment effect                          |               | S5: Null scenario<br>HR = 1 |        |       |       | S6: Disappointing effect scenario<br>HR = 0.886 |        |       |       | S7: Historical effect scenario<br>HR = 0.786 |        |       |       | S8: Anticipated effect scenario<br>HR = 0.55 |        |       |       |
| Parameters                                |               | Bias                        | SD     | RMSE  | Alpha | Bias                                            | SD     | RMSE  | Power | Bias                                         | SD     | RMSE  | Power | Bias                                         | SD     | RMSE  | Power |
| $\alpha_0$<br>0                           | $\omega$<br>0 | 0.0003                      | 0.241  | 0.243 | 0.104 | 0.0008                                          | 0.240  | 0.243 | 0.224 | 0.0036                                       | 0.245  | 0.247 | 0.382 | -0.0024                                      | 0.263  | 0.264 | 0.849 |
|                                           | 0.1           | -0.0494                     | 0.221  | 0.222 | 0.215 | -0.0290                                         | 0.208  | 0.195 | 0.399 | 0.0030                                       | 0.208  | 0.187 | 0.580 | 0.0594                                       | 0.254  | 0.263 | 0.936 |
|                                           | 0.2           | -0.0791                     | 0.206  | 0.214 | 0.321 | -0.0454                                         | 0.188  | 0.172 | 0.523 | 0.0025                                       | 0.185  | 0.155 | 0.693 | 0.0991                                       | 0.244  | 0.266 | 0.968 |
|                                           | 0.4           | -0.1168                     | 0.181  | 0.208 | 0.495 | -0.0651                                         | 0.160  | 0.147 | 0.692 | 0.0019                                       | 0.156  | 0.118 | 0.832 | 0.1541                                       | 0.222  | 0.274 | 0.989 |
|                                           | 0.6           | -0.1429                     | 0.161  | 0.206 | 0.646 | -0.0781                                         | 0.140  | 0.132 | 0.810 | 0.0014                                       | 0.136  | 0.093 | 0.904 | 0.1966                                       | 0.200  | 0.282 | 0.997 |
|                                           | 0.8           | -0.1658                     | 0.141  | 0.205 | 0.774 | -0.0882                                         | 0.122  | 0.120 | 0.899 | 0.0013                                       | 0.119  | 0.071 | 0.957 | 0.2374                                       | 0.172  | 0.291 | 0.999 |
|                                           | 1             | -0.1980                     | 0.103  | 0.203 | 0.947 | -0.0994                                         | 0.100  | 0.108 | 0.986 | 0.0013                                       | 0.100  | 0.042 | 0.995 | 0.3024                                       | 0.102  | 0.305 | 1     |
|                                           | 0.3           | 0                           | 0.0798 | 0.216 | 0.213 | 0.038                                           | 0.0755 | 0.217 | 0.213 | 0.115                                        | 0.0619 | 0.223 | 0.221 | 0.265                                        | 0.0813 | 0.243 | 0.239 |
| 0.1                                       |               | 0.0184                      | 0.211  | 0.195 | 0.104 | 0.0289                                          | 0.195  | 0.171 | 0.261 | 0.0598                                       | 0.188  | 0.163 | 0.470 | 0.1419                                       | 0.226  | 0.250 | 0.937 |
| 0.2                                       |               | -0.0180                     | 0.202  | 0.189 | 0.181 | 0.0029                                          | 0.179  | 0.150 | 0.389 | 0.0485                                       | 0.167  | 0.135 | 0.608 | 0.1772                                       | 0.212  | 0.260 | 0.971 |
| 0.4                                       |               | -0.0650                     | 0.185  | 0.183 | 0.328 | -0.0280                                         | 0.156  | 0.126 | 0.581 | 0.0359                                       | 0.142  | 0.102 | 0.772 | 0.2214                                       | 0.187  | 0.276 | 0.992 |
| 0.6                                       |               | -0.0996                     | 0.166  | 0.181 | 0.481 | -0.0475                                         | 0.138  | 0.111 | 0.718 | 0.0286                                       | 0.125  | 0.080 | 0.865 | 0.2522                                       | 0.165  | 0.288 | 0.998 |
| 0.8                                       |               | -0.1306                     | 0.145  | 0.180 | 0.640 | -0.0629                                         | 0.121  | 0.100 | 0.833 | 0.0234                                       | 0.112  | 0.063 | 0.935 | 0.2781                                       | 0.142  | 0.299 | 1     |
| 1                                         |               | -0.1739                     | 0.100  | 0.179 | 0.878 | -0.0788                                         | 0.099  | 0.089 | 0.965 | 0.0189                                       | 0.099  | 0.045 | 0.999 | 0.3099                                       | 0.100  | 0.312 | 1     |
| 0.6                                       |               | 0                           | 0.1150 | 0.205 | 0.216 | 0.020                                           | 0.1124 | 0.206 | 0.216 | 0.075                                        | 0.1169 | 0.212 | 0.224 | 0.206                                        | 0.1212 | 0.233 | 0.245 |
|                                           | 0.1           | 0.0548                      | 0.206  | 0.198 | 0.067 | 0.0598                                          | 0.191  | 0.176 | 0.193 | 0.0871                                       | 0.181  | 0.169 | 0.406 | 0.1781                                       | 0.212  | 0.258 | 0.931 |
|                                           | 0.2           | 0.0178                      | 0.201  | 0.189 | 0.126 | 0.0304                                          | 0.178  | 0.154 | 0.313 | 0.0710                                       | 0.163  | 0.142 | 0.548 | 0.2094                                       | 0.196  | 0.270 | 0.964 |
|                                           | 0.4           | -0.0327                     | 0.188  | 0.180 | 0.251 | -0.0051                                         | 0.157  | 0.128 | 0.496 | 0.0532                                       | 0.140  | 0.108 | 0.728 | 0.2471                                       | 0.171  | 0.285 | 0.990 |
|                                           | 0.6           | -0.0709                     | 0.172  | 0.174 | 0.385 | -0.0283                                         | 0.140  | 0.110 | 0.648 | 0.0426                                       | 0.124  | 0.087 | 0.833 | 0.2720                                       | 0.151  | 0.297 | 0.998 |
|                                           | 0.8           | -0.1067                     | 0.151  | 0.171 | 0.547 | -0.0472                                         | 0.123  | 0.095 | 0.775 | 0.0352                                       | 0.111  | 0.069 | 0.911 | 0.2921                                       | 0.131  | 0.306 | 0.999 |
|                                           | 1             | -0.1607                     | 0.099  | 0.166 | 0.805 | -0.0672                                         | 0.098  | 0.079 | 0.934 | 0.0287                                       | 0.098  | 0.050 | 0.984 | 0.3147                                       | 0.099  | 0.317 | 1     |
|                                           | 1             | 0                           | 0.1407 | 0.196 | 0.224 | 0.014                                           | 0.1395 | 0.198 | 0.225 | 0.056                                        | 0.1448 | 0.204 | 0.233 | 0.168                                        | 0.1503 | 0.225 | 0.255 |
| 0.1                                       |               | 0.0838                      | 0.202  | 0.205 | 0.046 | 0.0848                                          | 0.188  | 0.186 | 0.145 | 0.1083                                       | 0.177  | 0.180 | 0.355 | 0.2036                                       | 0.202  | 0.269 | 0.922 |
| 0.2                                       |               | 0.0474                      | 0.200  | 0.196 | 0.093 | 0.0535                                          | 0.178  | 0.164 | 0.257 | 0.0888                                       | 0.161  | 0.153 | 0.499 | 0.2314                                       | 0.185  | 0.280 | 0.961 |
| 0.4                                       |               | -0.0041                     | 0.190  | 0.183 | 0.193 | 0.0150                                          | 0.159  | 0.135 | 0.429 | 0.0676                                       | 0.139  | 0.119 | 0.677 | 0.2639                                       | 0.161  | 0.294 | 0.989 |
| 0.6                                       |               | -0.0448                     | 0.176  | 0.175 | 0.311 | -0.0113                                         | 0.143  | 0.115 | 0.582 | 0.0545                                       | 0.124  | 0.096 | 0.792 | 0.2846                                       | 0.142  | 0.304 | 0.997 |
| 0.8                                       |               | -0.0851                     | 0.156  | 0.166 | 0.458 | -0.0330                                         | 0.126  | 0.096 | 0.723 | 0.0450                                       | 0.112  | 0.077 | 0.883 | 0.3011                                       | 0.124  | 0.312 | 0.999 |
| 1                                         |               | -0.1501                     | 0.098  | 0.156 | 0.728 | -0.0577                                         | 0.097  | 0.071 | 0.900 | 0.0368                                       | 0.097  | 0.055 | 0.971 | 0.3188                                       | 0.098  | 0.321 | 1     |

**Table A3. Impact of  $\alpha_0$  and  $\omega$  on the operating characteristics for scenarios S9 to S12 (Weibull distribution for historical and new data, positive prior-data conflict), with  $\sigma_H^2$  equivalent to 329 events.**

| Control arm: positive prior-data conflict |               |                             |         |       |       |                                                  |         |       |       |                                               |         |       |       |                                               |         |       |       |
|-------------------------------------------|---------------|-----------------------------|---------|-------|-------|--------------------------------------------------|---------|-------|-------|-----------------------------------------------|---------|-------|-------|-----------------------------------------------|---------|-------|-------|
| Treatment effect                          |               | S9: Null scenario<br>HR = 1 |         |       |       | S10: Disappointing effect scenario<br>HR = 0.886 |         |       |       | S11: Historical effect scenario<br>HR = 0.786 |         |       |       | S12: Anticipated effect scenario<br>HR = 0.55 |         |       |       |
| Parameters                                |               | Bias                        | SD      | RMSE  | Alpha | Bias                                             | SD      | RMSE  | Power | Bias                                          | SD      | RMSE  | Power | Bias                                          | SD      | RMSE  | Power |
| $\alpha_0$<br>0                           | $\omega$<br>0 | 0.0009                      | 0.281   | 0.280 | 0.102 | -0.0003                                          | 0.280   | 0.284 | 0.201 | 0.0008                                        | 0.286   | 0.291 | 0.354 | -0.0089                                       | 0.315   | 0.315 | 0.764 |
|                                           | 0.1           | -0.0498                     | 0.256   | 0.248 | 0.213 | -0.0301                                          | 0.244   | 0.227 | 0.354 | 0.0007                                        | 0.246   | 0.223 | 0.538 | 0.0447                                        | 0.300   | 0.300 | 0.882 |
|                                           | 0.2           | -0.0801                     | 0.236   | 0.233 | 0.326 | -0.0463                                          | 0.219   | 0.198 | 0.486 | 0.0005                                        | 0.219   | 0.185 | 0.662 | 0.0872                                        | 0.285   | 0.295 | 0.931 |
|                                           | 0.4           | -0.1205                     | 0.205   | 0.221 | 0.494 | -0.0669                                          | 0.183   | 0.164 | 0.684 | 0.0004                                        | 0.181   | 0.139 | 0.816 | 0.1475                                        | 0.256   | 0.294 | 0.976 |
|                                           | 0.6           | -0.1493                     | 0.179   | 0.215 | 0.648 | -0.0808                                          | 0.157   | 0.143 | 0.801 | 0.0003                                        | 0.153   | 0.106 | 0.902 | 0.1947                                        | 0.227   | 0.297 | 0.994 |
|                                           | 0.8           | -0.1744                     | 0.153   | 0.212 | 0.791 | -0.0923                                          | 0.133   | 0.127 | 0.897 | 0                                             | 0.130   | 0.076 | 0.959 | 0.2402                                        | 0.192   | 0.301 | 0.999 |
|                                           | 1             | -0.2075                     | 0.107   | 0.211 | 0.975 | -0.1048                                          | 0.102   | 0.112 | 0.992 | 0                                             | 0.102   | 0.038 | 0.998 | 0.3125                                        | 0.104   | 0.315 | 1     |
|                                           | 0.3           | 0                           | -0.0605 | 0.246 | 0.237 | 0.132                                            | -0.0640 | 0.248 | 0.244 | 0.274                                         | -0.0616 | 0.256 | 0.250 | 0.481                                         | -0.0817 | 0.287 | 0.286 |
| 0.1                                       |               | -0.1043                     | 0.218   | 0.214 | 0.278 | -0.0799                                          | 0.210   | 0.192 | 0.472 | -0.0557                                       | 0.217   | 0.191 | 0.686 | -0.0180                                       | 0.285   | 0.279 | 0.969 |
| 0.2                                       |               | -0.1285                     | 0.198   | 0.207 | 0.402 | -0.0877                                          | 0.186   | 0.168 | 0.620 | -0.0447                                       | 0.192   | 0.157 | 0.801 | 0.0287                                        | 0.277   | 0.277 | 0.987 |
| 0.4                                       |               | -0.1577                     | 0.171   | 0.205 | 0.591 | -0.0968                                          | 0.155   | 0.144 | 0.783 | -0.0315                                       | 0.161   | 0.117 | 0.910 | 0.0957                                        | 0.258   | 0.277 | 0.999 |
| 0.6                                       |               | -0.1770                     | 0.149   | 0.205 | 0.734 | -0.1021                                          | 0.135   | 0.130 | 0.880 | -0.0232                                       | 0.138   | 0.089 | 0.959 | 0.1496                                        | 0.234   | 0.280 | 1     |
| 0.8                                       |               | -0.1921                     | 0.130   | 0.207 | 0.851 | -0.1061                                          | 0.118   | 0.122 | 0.949 | -0.0170                                       | 0.120   | 0.065 | 0.985 | 0.2033                                        | 0.202   | 0.284 | 1     |
| 1                                         |               | -0.2083                     | 0.103   | 0.212 | 0.975 | -0.1094                                          | 0.101   | 0.116 | 0.995 | -0.0110                                       | 0.101   | 0.039 | 0.999 | 0.2954                                        | 0.102   | 0.297 | 1     |
| 0.6                                       |               | 0                           | -0.0892 | 0.231 | 0.234 | 0.163                                            | -0.0938 | 0.235 | 0.242 | 0.336                                         | -0.0926 | 0.243 | 0.248 | 0.562                                         | -0.1145 | 0.275 | 0.287 |
|                                           | 0.1           | -0.1272                     | 0.202   | 0.214 | 0.331 | -0.1012                                          | 0.197   | 0.192 | 0.550 | -0.0769                                       | 0.208   | 0.193 | 0.763 | -0.0529                                       | 0.279   | 0.283 | 0.986 |
|                                           | 0.2           | -0.1474                     | 0.183   | 0.208 | 0.462 | -0.1046                                          | 0.175   | 0.170 | 0.685 | -0.0614                                       | 0.185   | 0.160 | 0.853 | -0.0068                                       | 0.275   | 0.280 | 0.996 |
|                                           | 0.4           | -0.1710                     | 0.158   | 0.207 | 0.641 | -0.1082                                          | 0.147   | 0.146 | 0.825 | -0.0437                                       | 0.156   | 0.121 | 0.942 | 0.0606                                        | 0.260   | 0.278 | 1     |
|                                           | 0.6           | -0.1862                     | 0.139   | 0.208 | 0.772 | -0.1104                                          | 0.129   | 0.134 | 0.909 | -0.0326                                       | 0.135   | 0.093 | 0.973 | 0.1169                                        | 0.240   | 0.278 | 1     |
|                                           | 0.8           | -0.1980                     | 0.122   | 0.210 | 0.879 | -0.1120                                          | 0.114   | 0.126 | 0.961 | -0.0241                                       | 0.119   | 0.069 | 0.991 | 0.1753                                        | 0.209   | 0.279 | 1     |
|                                           | 1             | -0.2098                     | 0.102   | 0.214 | 0.976 | -0.1131                                          | 0.100   | 0.120 | 0.995 | -0.0163                                       | 0.100   | 0.042 | 1     | 0.2850                                        | 0.101   | 0.287 | 1     |
|                                           | 1             | 0                           | -0.1108 | 0.221 | 0.238 | 0.194                                            | -0.1162 | 0.226 | 0.246 | 0.400                                         | -0.1158 | 0.235 | 0.253 | 0.628                                         | -0.1391 | 0.268 | 0.293 |
| 0.1                                       |               | -0.1433                     | 0.192   | 0.218 | 0.378 | -0.1171                                          | 0.190   | 0.197 | 0.613 | -0.0933                                       | 0.202   | 0.199 | 0.810 | -0.0809                                       | 0.274   | 0.289 | 0.993 |
| 0.2                                       |               | -0.1603                     | 0.174   | 0.213 | 0.503 | -0.1168                                          | 0.168   | 0.175 | 0.730 | -0.0749                                       | 0.181   | 0.167 | 0.889 | -0.0363                                       | 0.272   | 0.286 | 0.998 |
| 0.4                                       |               | -0.1804                     | 0.150   | 0.211 | 0.677 | -0.1168                                          | 0.142   | 0.152 | 0.860 | -0.0540                                       | 0.154   | 0.128 | 0.955 | 0.0302                                        | 0.262   | 0.282 | 1     |
| 0.6                                       |               | -0.1926                     | 0.132   | 0.212 | 0.800 | -0.1168                                          | 0.125   | 0.139 | 0.927 | -0.0409                                       | 0.135   | 0.100 | 0.980 | 0.0872                                        | 0.245   | 0.280 | 1     |
| 0.8                                       |               | -0.2022                     | 0.118   | 0.213 | 0.893 | -0.1168                                          | 0.112   | 0.130 | 0.966 | -0.0307                                       | 0.118   | 0.075 | 0.993 | 0.1487                                        | 0.217   | 0.277 | 1     |
| 1                                         |               | -0.2116                     | 0.100   | 0.216 | 0.973 | -0.1165                                          | 0.099   | 0.124 | 0.996 | -0.0211                                       | 0.099   | 0.046 | 1     | 0.2761                                        | 0.100   | 0.279 | 1     |
