# Supplementary material for: Incorporating individual historical controls and aggregate treatment effect estimates into a Bayesian survival trial: a simulation study
Source: PubMed Central journal article supplement (PMC6480797; doi:10.1186/s12874-019-0714-z), 2019-04-24
Supplement: 12874_2019_714_MOESM9_ESM.pdf [file 12874_2019_714_MOESM9_ESM.pdf]

**Table A4. Impact of  $\alpha_0$  and  $\omega$  on the operating characteristics for scenarios S13 to S16 (Piecewise distribution for historical and new data, commensurate control arm), with  $\sigma_H^2$  equivalent to 329 events.**

| Commensurate control arm |               |                              |         |       |       |                                                  |         |       |       |                                               |         |       |       |                                               |         |       |       |
|--------------------------|---------------|------------------------------|---------|-------|-------|--------------------------------------------------|---------|-------|-------|-----------------------------------------------|---------|-------|-------|-----------------------------------------------|---------|-------|-------|
| Treatment effect         |               | S13: Null scenario<br>HR = 1 |         |       |       | S14: Disappointing effect scenario<br>HR = 0.886 |         |       |       | S15: Historical effect scenario<br>HR = 0.786 |         |       |       | S16: Anticipated effect scenario<br>HR = 0.55 |         |       |       |
| Parameters               |               | Bias                         | SD      | RMSE  | Alpha | Bias                                             | SD      | RMSE  | Power | Bias                                          | SD      | RMSE  | Power | Bias                                          | SD      | RMSE  | Power |
| $\alpha_0$<br>0          | $\omega$<br>0 | -0.0018                      | 0.274   | 0.280 | 0.104 | -0.0050                                          | 0.277   | 0.283 | 0.211 | -0.0029                                       | 0.287   | 0.296 | 0.333 | -0.0139                                       | 0.311   | 0.320 | 0.770 |
|                          | 0.1           | -0.0514                      | 0.249   | 0.248 | 0.217 | -0.0333                                          | 0.242   | 0.225 | 0.364 | -0.0019                                       | 0.248   | 0.229 | 0.500 | 0.0419                                        | 0.296   | 0.304 | 0.880 |
|                          | 0.2           | -0.0813                      | 0.230   | 0.235 | 0.328 | -0.0491                                          | 0.217   | 0.195 | 0.489 | -0.0018                                       | 0.221   | 0.192 | 0.639 | 0.0843                                        | 0.281   | 0.300 | 0.935 |
|                          | 0.4           | -0.1205                      | 0.200   | 0.222 | 0.508 | -0.0685                                          | 0.182   | 0.162 | 0.680 | -0.0010                                       | 0.184   | 0.146 | 0.799 | 0.1441                                        | 0.254   | 0.300 | 0.979 |
|                          | 0.6           | -0.1483                      | 0.175   | 0.216 | 0.654 | -0.0813                                          | 0.156   | 0.142 | 0.808 | -0.0009                                       | 0.157   | 0.112 | 0.883 | 0.1910                                        | 0.226   | 0.303 | 0.993 |
|                          | 0.8           | -0.1733                      | 0.148   | 0.213 | 0.794 | -0.0919                                          | 0.133   | 0.126 | 0.902 | -0.0007                                       | 0.132   | 0.080 | 0.953 | 0.2367                                        | 0.192   | 0.306 | 0.998 |
|                          | 1             | -0.2070                      | 0.102   | 0.211 | 0.972 | -0.1039                                          | 0.102   | 0.111 | 0.992 | -0.0001                                       | 0.103   | 0.038 | 0.998 | 0.3132                                        | 0.104   | 0.315 | 1     |
|                          | 0.3           | 0                            | -0.0227 | 0.241 | 0.227 | 0.095                                            | -0.0251 | 0.246 | 0.233 | 0.225                                         | -0.0251 | 0.256 | 0.246 | 0.385                                         | -0.0439 | 0.283 | 0.276 |
| 0.1                      |               | -0.0732                      | 0.218   | 0.206 | 0.226 | -0.0509                                          | 0.210   | 0.181 | 0.408 | -0.0177                                       | 0.216   | 0.183 | 0.598 | 0.0280                                        | 0.276   | 0.271 | 0.951 |
| 0.2                      |               | -0.1016                      | 0.200   | 0.200 | 0.341 | -0.0641                                          | 0.187   | 0.158 | 0.552 | -0.0137                                       | 0.191   | 0.151 | 0.731 | 0.0732                                        | 0.265   | 0.273 | 0.981 |
| 0.4                      |               | -0.1368                      | 0.174   | 0.197 | 0.527 | -0.0791                                          | 0.157   | 0.135 | 0.734 | -0.0089                                       | 0.160   | 0.112 | 0.862 | 0.1353                                        | 0.242   | 0.278 | 0.995 |
| 0.6                      |               | -0.1598                      | 0.152   | 0.198 | 0.673 | -0.0882                                          | 0.136   | 0.122 | 0.851 | -0.0060                                       | 0.138   | 0.085 | 0.932 | 0.1833                                        | 0.217   | 0.284 | 0.998 |
| 0.8                      |               | -0.1796                      | 0.132   | 0.201 | 0.812 | -0.0951                                          | 0.119   | 0.114 | 0.929 | -0.0036                                       | 0.120   | 0.062 | 0.971 | 0.2295                                        | 0.186   | 0.291 | 0.999 |
| 1                        |               | -0.2013                      | 0.101   | 0.205 | 0.966 | -0.1017                                          | 0.101   | 0.109 | 0.991 | -0.0011                                       | 0.101   | 0.038 | 0.999 | 0.3027                                        | 0.102   | 0.305 | 1     |
| 0.6                      |               | 0                            | -0.0299 | 0.227 | 0.214 | 0.096                                            | -0.0325 | 0.233 | 0.220 | 0.239                                         | -0.0330 | 0.243 | 0.234 | 0.421                                         | -0.0510 | 0.272 | 0.266 |
|                          | 0.1           | -0.0791                      | 0.206   | 0.196 | 0.234 | -0.0563                                          | 0.198   | 0.172 | 0.438 | -0.0228                                       | 0.204   | 0.173 | 0.642 | 0.0209                                        | 0.267   | 0.264 | 0.970 |
|                          | 0.2           | -0.1065                      | 0.189   | 0.193 | 0.352 | -0.0683                                          | 0.176   | 0.151 | 0.579 | -0.0175                                       | 0.181   | 0.142 | 0.763 | 0.0656                                        | 0.258   | 0.267 | 0.990 |
|                          | 0.4           | -0.1394                      | 0.165   | 0.192 | 0.534 | -0.0815                                          | 0.149   | 0.130 | 0.752 | -0.0116                                       | 0.152   | 0.106 | 0.881 | 0.1276                                        | 0.237   | 0.273 | 0.997 |
|                          | 0.6           | -0.1614                      | 0.145   | 0.195 | 0.680 | -0.0894                                          | 0.130   | 0.120 | 0.863 | -0.0077                                       | 0.132   | 0.081 | 0.943 | 0.1757                                        | 0.214   | 0.279 | 0.999 |
|                          | 0.8           | -0.1788                      | 0.127   | 0.198 | 0.807 | -0.0952                                          | 0.116   | 0.113 | 0.933 | -0.0048                                       | 0.117   | 0.060 | 0.976 | 0.2221                                        | 0.184   | 0.286 | 0.999 |
|                          | 1             | -0.1984                      | 0.100   | 0.203 | 0.958 | -0.1007                                          | 0.100   | 0.108 | 0.989 | -0.0020                                       | 0.100   | 0.039 | 0.998 | 0.2973                                        | 0.101   | 0.300 | 1     |
|                          | 1             | 0                            | -0.0345 | 0.218 | 0.208 | 0.104                                            | -0.0376 | 0.224 | 0.215 | 0.255                                         | -0.0381 | 0.234 | 0.228 | 0.454                                         | -0.0555 | 0.264 | 0.261 |
| 0.1                      |               | -0.0825                      | 0.197   | 0.193 | 0.244 | -0.0596                                          | 0.190   | 0.168 | 0.459 | -0.0262                                       | 0.197   | 0.170 | 0.669 | 0.0153                                        | 0.261   | 0.261 | 0.981 |
| 0.2                      |               | -0.1088                      | 0.182   | 0.190 | 0.357 | -0.0706                                          | 0.170   | 0.148 | 0.597 | -0.0202                                       | 0.175   | 0.140 | 0.783 | 0.0595                                        | 0.253   | 0.264 | 0.992 |
| 0.4                      |               | -0.1403                      | 0.159   | 0.191 | 0.541 | -0.0827                                          | 0.144   | 0.129 | 0.763 | -0.0133                                       | 0.147   | 0.105 | 0.893 | 0.1207                                        | 0.234   | 0.271 | 0.997 |
| 0.6                      |               | -0.1610                      | 0.141   | 0.193 | 0.686 | -0.0898                                          | 0.127   | 0.119 | 0.867 | -0.0090                                       | 0.129   | 0.081 | 0.945 | 0.1685                                        | 0.212   | 0.277 | 0.999 |
| 0.8                      |               | -0.1779                      | 0.124   | 0.196 | 0.807 | -0.0951                                          | 0.113   | 0.113 | 0.934 | -0.0056                                       | 0.115   | 0.060 | 0.977 | 0.2154                                        | 0.183   | 0.283 | 0.999 |
| 1                        |               | -0.1963                      | 0.099   | 0.201 | 0.949 | -0.1000                                          | 0.099   | 0.108 | 0.986 | -0.0026                                       | 0.099   | 0.041 | 0.998 | 0.2930                                        | 0.100   | 0.295 | 1     |

**Table A5. Impact of  $\alpha_0$  and  $\omega$  on the operating characteristics for scenarios S17 to S20 (Piecewise distribution for historical and new data, negative prior-data conflict), with  $\sigma_H^2$  equivalent to 329 events.**

| Control arm: negative prior-data conflict |               |                              |        |       |       |                                                  |        |       |       |                                               |        |       |       |                                               |        |       |       |
|-------------------------------------------|---------------|------------------------------|--------|-------|-------|--------------------------------------------------|--------|-------|-------|-----------------------------------------------|--------|-------|-------|-----------------------------------------------|--------|-------|-------|
| Treatment effect                          |               | S17: Null scenario<br>HR = 1 |        |       |       | S18: Disappointing effect scenario<br>HR = 0.886 |        |       |       | S19: Historical effect scenario<br>HR = 0.786 |        |       |       | S20: Anticipated effect scenario<br>HR = 0.55 |        |       |       |
| Parameters                                |               | Bias                         | SD     | RMSE  | Alpha | Bias                                             | SD     | RMSE  | Power | Bias                                          | SD     | RMSE  | Power | Bias                                          | SD     | RMSE  | Power |
| $\alpha_0$<br>0                           | $\omega$<br>0 | -0.0068                      | 0.251  | 0.254 | 0.109 | -0.0046                                          | 0.256  | 0.261 | 0.219 | -0.0111                                       | 0.262  | 0.265 | 0.368 | -0.0079                                       | 0.283  | 0.286 | 0.819 |
|                                           | 0.1           | -0.0581                      | 0.230  | 0.228 | 0.221 | -0.0318                                          | 0.223  | 0.209 | 0.387 | -0.0086                                       | 0.224  | 0.202 | 0.559 | 0.0582                                        | 0.271  | 0.280 | 0.913 |
|                                           | 0.2           | -0.0878                      | 0.212  | 0.219 | 0.336 | -0.0470                                          | 0.200  | 0.183 | 0.515 | -0.0074                                       | 0.199  | 0.168 | 0.688 | 0.0997                                        | 0.257  | 0.281 | 0.954 |
|                                           | 0.4           | -0.1255                      | 0.185  | 0.211 | 0.511 | -0.0662                                          | 0.170  | 0.154 | 0.687 | -0.0054                                       | 0.166  | 0.127 | 0.836 | 0.1558                                        | 0.232  | 0.286 | 0.984 |
|                                           | 0.6           | -0.1516                      | 0.162  | 0.209 | 0.650 | -0.0786                                          | 0.148  | 0.136 | 0.808 | -0.0038                                       | 0.144  | 0.100 | 0.916 | 0.1994                                        | 0.207  | 0.292 | 0.994 |
|                                           | 0.8           | -0.1740                      | 0.139  | 0.209 | 0.793 | -0.0894                                          | 0.127  | 0.122 | 0.896 | -0.0025                                       | 0.124  | 0.074 | 0.963 | 0.2408                                        | 0.177  | 0.299 | 0.998 |
|                                           | 1             | -0.2030                      | 0.101  | 0.207 | 0.966 | -0.1015                                          | 0.101  | 0.109 | 0.989 | -0.0012                                       | 0.101  | 0.040 | 0.997 | 0.3080                                        | 0.102  | 0.310 | 1     |
|                                           | 0.3           | 0                            | 0.1096 | 0.224 | 0.235 | 0.028                                            | 0.1107 | 0.229 | 0.242 | 0.088                                         | 0.1041 | 0.236 | 0.245 | 0.216                                         | 0.1019 | 0.258 | 0.268 |
| 0.1                                       |               | 0.0475                       | 0.221  | 0.213 | 0.083 | 0.0581                                           | 0.209  | 0.196 | 0.211 | 0.0760                                        | 0.202  | 0.185 | 0.397 | 0.1616                                        | 0.236  | 0.273 | 0.899 |
| 0.2                                       |               | 0.0092                       | 0.214  | 0.203 | 0.148 | 0.0286                                           | 0.194  | 0.172 | 0.327 | 0.0619                                        | 0.180  | 0.154 | 0.545 | 0.1949                                        | 0.218  | 0.280 | 0.947 |
| 0.4                                       |               | -0.0424                      | 0.197  | 0.192 | 0.286 | -0.0072                                          | 0.170  | 0.144 | 0.506 | 0.0456                                        | 0.153  | 0.118 | 0.724 | 0.2364                                        | 0.190  | 0.292 | 0.980 |
| 0.6                                       |               | -0.0818                      | 0.179  | 0.186 | 0.429 | -0.0312                                          | 0.150  | 0.124 | 0.655 | 0.0357                                        | 0.134  | 0.093 | 0.833 | 0.2651                                        | 0.166  | 0.301 | 0.992 |
| 0.8                                       |               | -0.1188                      | 0.155  | 0.182 | 0.588 | -0.0518                                          | 0.131  | 0.107 | 0.790 | 0.0284                                        | 0.118  | 0.072 | 0.921 | 0.2895                                        | 0.142  | 0.310 | 0.998 |
| 1                                         |               | -0.1724                      | 0.100  | 0.177 | 0.865 | -0.0751                                          | 0.100  | 0.085 | 0.954 | 0.0212                                        | 0.100  | 0.045 | 0.989 | 0.3188                                        | 0.101  | 0.321 | 1     |
| 0.6                                       |               | 0                            | 0.1542 | 0.216 | 0.249 | 0.014                                            | 0.1543 | 0.217 | 0.255 | 0.055                                         | 0.1473 | 0.224 | 0.257 | 0.164                                         | 0.1430 | 0.248 | 0.278 |
|                                           | 0.1           | 0.0954                       | 0.216  | 0.228 | 0.051 | 0.0974                                           | 0.206  | 0.212 | 0.150 | 0.1095                                        | 0.196  | 0.200 | 0.332 | 0.1962                                        | 0.222  | 0.283 | 0.884 |
|                                           | 0.2           | 0.0570                       | 0.213  | 0.216 | 0.097 | 0.0644                                           | 0.194  | 0.188 | 0.251 | 0.0898                                        | 0.177  | 0.169 | 0.467 | 0.2252                                        | 0.203  | 0.290 | 0.939 |
|                                           | 0.4           | 0.0029                       | 0.202  | 0.201 | 0.204 | 0.0237                                           | 0.174  | 0.157 | 0.411 | 0.0671                                        | 0.152  | 0.132 | 0.653 | 0.2600                                        | 0.175  | 0.301 | 0.975 |
|                                           | 0.6           | -0.0407                      | 0.187  | 0.189 | 0.321 | -0.0056                                          | 0.155  | 0.133 | 0.570 | 0.0532                                        | 0.134  | 0.106 | 0.782 | 0.2831                                        | 0.154  | 0.310 | 0.990 |
|                                           | 0.8           | -0.0841                      | 0.165  | 0.179 | 0.480 | -0.0307                                          | 0.135  | 0.110 | 0.714 | 0.0425                                        | 0.118  | 0.083 | 0.884 | 0.3021                                        | 0.132  | 0.317 | 0.997 |
|                                           | 1             | -0.1578                      | 0.099  | 0.163 | 0.764 | -0.0625                                          | 0.099  | 0.075 | 0.908 | 0.0318                                        | 0.099  | 0.052 | 0.977 | 0.3237                                        | 0.100  | 0.326 | 0.999 |
|                                           | 1             | 0                            | 0.1834 | 0.211 | 0.264 | 0.011                                            | 0.1828 | 0.209 | 0.269 | 0.041                                         | 0.1754 | 0.216 | 0.271 | 0.138                                         | 0.1695 | 0.240 | 0.289 |
| 0.1                                       |               | 0.1287                       | 0.211  | 0.244 | 0.035 | 0.1252                                           | 0.202  | 0.228 | 0.121 | 0.1328                                        | 0.192  | 0.215 | 0.291 | 0.2177                                        | 0.212  | 0.293 | 0.867 |
| 0.2                                       |               | 0.0921                       | 0.211  | 0.231 | 0.072 | 0.0914                                           | 0.193  | 0.204 | 0.202 | 0.1101                                        | 0.176  | 0.185 | 0.408 | 0.2435                                        | 0.193  | 0.299 | 0.928 |
| 0.4                                       |               | 0.0382                       | 0.204  | 0.214 | 0.156 | 0.0475                                           | 0.176  | 0.172 | 0.356 | 0.0838                                        | 0.153  | 0.147 | 0.601 | 0.2736                                        | 0.167  | 0.309 | 0.971 |
| 0.6                                       |               | -0.0072                      | 0.192  | 0.199 | 0.256 | 0.0157                                           | 0.160  | 0.146 | 0.497 | 0.0669                                        | 0.135  | 0.120 | 0.735 | 0.2934                                        | 0.146  | 0.316 | 0.987 |
| 0.8                                       |               | -0.0552                      | 0.172  | 0.184 | 0.398 | -0.0134                                          | 0.140  | 0.119 | 0.647 | 0.0535                                        | 0.120  | 0.094 | 0.846 | 0.3093                                        | 0.127  | 0.322 | 0.996 |
| 1                                         |               | -0.1470                      | 0.099  | 0.153 | 0.683 | -0.0533                                          | 0.099  | 0.069 | 0.865 | 0.0395                                        | 0.099  | 0.058 | 0.959 | 0.3272                                        | 0.099  | 0.330 | 0.999 |

**Table A6. Impact of  $\alpha_0$  and  $\omega$  on the operating characteristics for scenarios S21 to S24 (Piecewise distribution for historical and new data, positive prior-data conflict), with  $\sigma_H^2$  equivalent to 329 events.**

| Control arm: positive prior-data conflict |               |                              |         |       |       |                                                  |         |       |       |                                               |         |       |       |                                               |         |       |       |
|-------------------------------------------|---------------|------------------------------|---------|-------|-------|--------------------------------------------------|---------|-------|-------|-----------------------------------------------|---------|-------|-------|-----------------------------------------------|---------|-------|-------|
| Treatment effect                          |               | S21: Null scenario<br>HR = 1 |         |       |       | S22: Disappointing effect scenario<br>HR = 0.886 |         |       |       | S23: Historical effect scenario<br>HR = 0.786 |         |       |       | S24: Anticipated effect scenario<br>HR = 0.55 |         |       |       |
| Parameters                                |               | Bias                         | SD      | RMSE  | Alpha | Bias                                             | SD      | RMSE  | Power | Bias                                          | SD      | RMSE  | Power | Bias                                          | SD      | RMSE  | Power |
| $\alpha_0$<br>0                           | $\omega$<br>0 | 0.0015                       | 0.299   | 0.307 | 0.108 | -0.0051                                          | 0.307   | 0.316 | 0.200 | -0.0106                                       | 0.315   | 0.323 | 0.323 | -0.0186                                       | 0.345   | 0.349 | 0.707 |
|                                           | 0.1           | -0.0481                      | 0.272   | 0.270 | 0.203 | -0.0303                                          | 0.269   | 0.255 | 0.308 | -0.0082                                       | 0.274   | 0.251 | 0.478 | 0.0491                                        | 0.324   | 0.328 | 0.833 |
|                                           | 0.2           | -0.0782                      | 0.250   | 0.253 | 0.310 | -0.0453                                          | 0.242   | 0.222 | 0.469 | -0.0067                                       | 0.244   | 0.210 | 0.607 | 0.0936                                        | 0.305   | 0.320 | 0.900 |
|                                           | 0.4           | -0.1188                      | 0.216   | 0.236 | 0.502 | -0.0655                                          | 0.202   | 0.182 | 0.654 | -0.0050                                       | 0.202   | 0.157 | 0.775 | 0.1555                                        | 0.271   | 0.314 | 0.962 |
|                                           | 0.6           | -0.1487                      | 0.186   | 0.227 | 0.659 | -0.0801                                          | 0.171   | 0.156 | 0.788 | -0.0036                                       | 0.169   | 0.120 | 0.881 | 0.2037                                        | 0.237   | 0.314 | 0.985 |
|                                           | 0.8           | -0.1748                      | 0.156   | 0.220 | 0.799 | -0.0919                                          | 0.143   | 0.135 | 0.892 | -0.0021                                       | 0.140   | 0.087 | 0.953 | 0.2499                                        | 0.197   | 0.316 | 0.996 |
|                                           | 1             | -0.2114                      | 0.103   | 0.215 | 0.983 | -0.1063                                          | 0.104   | 0.112 | 0.995 | 0                                             | 0.104   | 0.035 | 0.999 | 0.3212                                        | 0.105   | 0.323 | 1     |
|                                           | 0.3           | 0                            | -0.1517 | 0.259 | 0.287 | 0.214                                            | -0.1585 | 0.268 | 0.299 | 0.392                                         | -0.1618 | 0.277 | 0.309 | 0.574                                         | -0.1670 | 0.311 | 0.343 |
| 0.1                                       |               | -0.1749                      | 0.222   | 0.255 | 0.392 | -0.1476                                          | 0.227   | 0.240 | 0.591 | -0.1207                                       | 0.242   | 0.244 | 0.756 | -0.0919                                       | 0.313   | 0.327 | 0.971 |
| 0.2                                       |               | -0.1871                      | 0.197   | 0.243 | 0.537 | -0.1413                                          | 0.200   | 0.211 | 0.722 | -0.0973                                       | 0.217   | 0.206 | 0.853 | -0.0408                                       | 0.308   | 0.319 | 0.989 |
| 0.4                                       |               | -0.2017                      | 0.165   | 0.233 | 0.728 | -0.1343                                          | 0.166   | 0.178 | 0.867 | -0.0694                                       | 0.183   | 0.159 | 0.945 | 0.0363                                        | 0.291   | 0.310 | 0.997 |
| 0.6                                       |               | -0.2107                      | 0.142   | 0.229 | 0.848 | -0.1299                                          | 0.142   | 0.157 | 0.936 | -0.0503                                       | 0.157   | 0.123 | 0.978 | 0.1006                                        | 0.266   | 0.304 | 0.999 |
| 0.8                                       |               | -0.2179                      | 0.123   | 0.228 | 0.928 | -0.1266                                          | 0.123   | 0.143 | 0.973 | -0.0355                                       | 0.133   | 0.090 | 0.993 | 0.1683                                        | 0.230   | 0.301 | 1     |
| 1                                         |               | -0.2244                      | 0.101   | 0.228 | 0.993 | -0.1227                                          | 0.102   | 0.128 | 0.999 | -0.0198                                       | 0.102   | 0.042 | 1     | 0.2948                                        | 0.102   | 0.297 | 1     |
| 0.6                                       |               | 0                            | -0.2058 | 0.245 | 0.308 | 0.301                                            | -0.2122 | 0.254 | 0.320 | 0.506                                         | -0.2147 | 0.264 | 0.329 | 0.700                                         | -0.2190 | 0.298 | 0.362 |
|                                           | 0.1           | -0.2145                      | 0.205   | 0.273 | 0.510 | -0.1860                                          | 0.215   | 0.261 | 0.713 | -0.1611                                       | 0.235   | 0.265 | 0.854 | -0.1505                                       | 0.308   | 0.347 | 0.990 |
|                                           | 0.2           | -0.2191                      | 0.182   | 0.260 | 0.648 | -0.1724                                          | 0.191   | 0.231 | 0.822 | -0.1312                                       | 0.214   | 0.230 | 0.922 | -0.1012                                       | 0.307   | 0.337 | 0.997 |
|                                           | 0.4           | -0.2241                      | 0.152   | 0.247 | 0.810 | -0.1560                                          | 0.160   | 0.195 | 0.926 | -0.0951                                       | 0.183   | 0.181 | 0.974 | -0.0249                                       | 0.298   | 0.324 | 0.999 |
|                                           | 0.6           | -0.2274                      | 0.133   | 0.241 | 0.901 | -0.1464                                          | 0.139   | 0.173 | 0.965 | -0.0714                                       | 0.160   | 0.145 | 0.990 | 0.0418                                        | 0.280   | 0.314 | 1     |
|                                           | 0.8           | -0.2295                      | 0.117   | 0.238 | 0.953 | -0.1388                                          | 0.121   | 0.155 | 0.987 | -0.0512                                       | 0.136   | 0.106 | 0.998 | 0.1175                                        | 0.247   | 0.304 | 1     |
|                                           | 1             | -0.2312                      | 0.100   | 0.234 | 0.995 | -0.1311                                          | 0.101   | 0.136 | 0.999 | -0.0297                                       | 0.101   | 0.047 | 1     | 0.2812                                        | 0.101   | 0.283 | 1     |
|                                           | 1             | 0                            | -0.2394 | 0.235 | 0.327 | 0.373                                            | -0.2460 | 0.245 | 0.338 | 0.597                                         | -0.2479 | 0.255 | 0.347 | 0.777                                         | -0.2513 | 0.290 | 0.378 |
| 0.1                                       |               | -0.2386                      | 0.196   | 0.289 | 0.593 | -0.2107                                          | 0.210   | 0.279 | 0.784 | -0.1882                                       | 0.231   | 0.285 | 0.904 | -0.1892                                       | 0.302   | 0.364 | 0.997 |
| 0.2                                       |               | -0.2381                      | 0.174   | 0.273 | 0.722 | -0.1921                                          | 0.188   | 0.247 | 0.876 | -0.1551                                       | 0.213   | 0.249 | 0.951 | -0.1439                                       | 0.305   | 0.355 | 0.998 |
| 0.4                                       |               | -0.2377                      | 0.146   | 0.258 | 0.857 | -0.1713                                          | 0.159   | 0.211 | 0.949 | -0.1149                                       | 0.186   | 0.200 | 0.985 | -0.0706                                       | 0.300   | 0.340 | 1     |
| 0.6                                       |               | -0.2374                      | 0.128   | 0.250 | 0.925 | -0.1585                                          | 0.139   | 0.187 | 0.976 | -0.0872                                       | 0.162   | 0.163 | 0.995 | -0.0023                                       | 0.286   | 0.327 | 1     |
| 0.8                                       |               | -0.2370                      | 0.114   | 0.245 | 0.966 | -0.1480                                          | 0.121   | 0.166 | 0.992 | -0.0641                                       | 0.139   | 0.124 | 1     | 0.0761                                        | 0.259   | 0.312 | 1     |
| 1                                         |               | -0.2363                      | 0.100   | 0.240 | 0.996 | -0.1375                                          | 0.100   | 0.143 | 0.999 | -0.0372                                       | 0.100   | 0.053 | 1     | 0.2706                                        | 0.100   | 0.273 | 1     |
