# Supplementary material for: Incorporating individual historical controls and aggregate treatment effect estimates into a Bayesian survival trial: a simulation study
Source: PubMed Central journal article supplement (PMC6480797; doi:10.1186/s12874-019-0714-z), 2019-04-24
Supplement: 12874_2019_714_MOESM10_ESM.pdf [file 12874_2019_714_MOESM10_ESM.pdf]

**Table A7. Impact of  $\alpha_0$  and  $\omega$  on the operating characteristics for scenarios S1 to S4 (Weibull distribution for historical and new data, commensurate control arm), with  $\sigma_H^2$  equivalent to 66 events.**

| Commensurate control arm |               |                             |         |       |       |                                                 |         |       |       |                                              |         |       |       |                                              |         |       |       |
|--------------------------|---------------|-----------------------------|---------|-------|-------|-------------------------------------------------|---------|-------|-------|----------------------------------------------|---------|-------|-------|----------------------------------------------|---------|-------|-------|
| Treatment effect         |               | S1: Null scenario<br>HR = 1 |         |       |       | S2: Disappointing effect scenario<br>HR = 0.886 |         |       |       | S3: Historical effect scenario<br>HR = 0.786 |         |       |       | S4: Anticipated effect scenario<br>HR = 0.55 |         |       |       |
| Parameters               |               | Bias                        | SD      | RMSE  | Alpha | Bias                                            | SD      | RMSE  | Power | Bias                                         | SD      | RMSE  | Power | Bias                                         | SD      | RMSE  | Power |
| $\alpha_0$<br>0          | $\omega$<br>0 | 0.0024                      | 0.263   | 0.262 | 0.100 | 0.0015                                          | 0.268   | 0.267 | 0.208 | 0.0022                                       | 0.275   | 0.275 | 0.359 | -0.0075                                      | 0.304   | 0.298 | 0.794 |
|                          | 0.1           | -0.0338                     | 0.246   | 0.235 | 0.127 | -0.0182                                         | 0.239   | 0.226 | 0.259 | 0.0020                                       | 0.243   | 0.225 | 0.422 | 0.0381                                       | 0.279   | 0.277 | 0.835 |
|                          | 0.2           | -0.0556                     | 0.234   | 0.221 | 0.147 | -0.0297                                         | 0.225   | 0.203 | 0.289 | 0.0015                                       | 0.228   | 0.199 | 0.460 | 0.0706                                       | 0.269   | 0.268 | 0.854 |
|                          | 0.4           | -0.0825                     | 0.218   | 0.203 | 0.174 | -0.0434                                         | 0.207   | 0.177 | 0.324 | 0.0011                                       | 0.209   | 0.168 | 0.502 | 0.1142                                       | 0.250   | 0.257 | 0.879 |
|                          | 0.6           | -0.0998                     | 0.205   | 0.193 | 0.189 | -0.0518                                         | 0.195   | 0.161 | 0.344 | 0.0010                                       | 0.197   | 0.149 | 0.518 | 0.1455                                       | 0.233   | 0.250 | 0.889 |
|                          | 0.8           | -0.1130                     | 0.193   | 0.184 | 0.199 | -0.0578                                         | 0.186   | 0.148 | 0.354 | 0.0009                                       | 0.188   | 0.135 | 0.532 | 0.1719                                       | 0.215   | 0.243 | 0.895 |
|                          | 1             | -0.1250                     | 0.181   | 0.176 | 0.204 | -0.0627                                         | 0.178   | 0.139 | 0.365 | 0.0008                                       | 0.181   | 0.124 | 0.542 | 0.2014                                       | 0.186   | 0.235 | 0.900 |
|                          | 0.3           | 0                           | -0.0058 | 0.232 | 0.214 | 0.084                                           | -0.0071 | 0.238 | 0.220 | 0.211                                        | -0.0070 | 0.245 | 0.231 | 0.396                                        | -0.0158 | 0.274 | 0.259 |
| 0.1                      |               | -0.0405                     | 0.218   | 0.194 | 0.114 | -0.0255                                         | 0.214   | 0.186 | 0.265 | -0.0068                                      | 0.218   | 0.188 | 0.469 | 0.0302                                       | 0.258   | 0.243 | 0.912 |
| 0.2                      |               | -0.0599                     | 0.209   | 0.184 | 0.135 | -0.0349                                         | 0.202   | 0.169 | 0.296 | -0.0063                                      | 0.205   | 0.167 | 0.504 | 0.0625                                       | 0.249   | 0.237 | 0.930 |
| 0.4                      |               | -0.0821                     | 0.195   | 0.174 | 0.156 | -0.0451                                         | 0.188   | 0.151 | 0.332 | -0.0042                                      | 0.191   | 0.144 | 0.545 | 0.1047                                       | 0.233   | 0.229 | 0.944 |
| 0.6                      |               | -0.0954                     | 0.186   | 0.168 | 0.169 | -0.0509                                         | 0.180   | 0.140 | 0.353 | -0.0030                                      | 0.182   | 0.131 | 0.565 | 0.1338                                       | 0.217   | 0.224 | 0.951 |
| 0.8                      |               | -0.1049                     | 0.178   | 0.164 | 0.181 | -0.0546                                         | 0.174   | 0.134 | 0.366 | -0.0021                                      | 0.176   | 0.122 | 0.576 | 0.1580                                       | 0.201   | 0.219 | 0.954 |
| 1                        |               | -0.1124                     | 0.171   | 0.161 | 0.187 | -0.0573                                         | 0.169   | 0.129 | 0.376 | -0.0014                                      | 0.172   | 0.115 | 0.588 | 0.1829                                       | 0.177   | 0.215 | 0.955 |
| 0.6                      |               | 0                           | -0.0095 | 0.219 | 0.200 | 0.082                                           | -0.0108 | 0.225 | 0.206 | 0.222                                        | -0.0111 | 0.233 | 0.218 | 0.418                                        | -0.0199 | 0.261 | 0.248 |
|                          | 0.1           | -0.0424                     | 0.207   | 0.183 | 0.114 | -0.0277                                         | 0.203   | 0.176 | 0.278 | -0.0107                                      | 0.208   | 0.178 | 0.499 | 0.0255                                       | 0.248   | 0.233 | 0.943 |
|                          | 0.2           | -0.0602                     | 0.198   | 0.175 | 0.135 | -0.0360                                         | 0.192   | 0.161 | 0.309 | -0.0082                                      | 0.196   | 0.159 | 0.537 | 0.0574                                       | 0.240   | 0.228 | 0.953 |
|                          | 0.4           | -0.0805                     | 0.186   | 0.166 | 0.154 | -0.0449                                         | 0.180   | 0.144 | 0.344 | -0.0057                                      | 0.184   | 0.138 | 0.571 | 0.0982                                       | 0.225   | 0.221 | 0.963 |
|                          | 0.6           | -0.0923                     | 0.178   | 0.161 | 0.169 | -0.0499                                         | 0.173   | 0.136 | 0.363 | -0.0042                                      | 0.176   | 0.127 | 0.588 | 0.1265                                       | 0.211   | 0.215 | 0.967 |
|                          | 0.8           | -0.1004                     | 0.172   | 0.158 | 0.174 | -0.0529                                         | 0.168   | 0.130 | 0.375 | -0.0031                                      | 0.171   | 0.119 | 0.604 | 0.1499                                       | 0.195   | 0.211 | 0.969 |
|                          | 1             | -0.1068                     | 0.166   | 0.156 | 0.183 | -0.0551                                         | 0.165   | 0.127 | 0.386 | -0.0023                                      | 0.167   | 0.114 | 0.612 | 0.1735                                       | 0.172   | 0.206 | 0.971 |
|                          | 1             | 0                           | -0.0121 | 0.210 | 0.193 | 0.087                                           | -0.0137 | 0.216 | 0.200 | 0.233                                        | -0.0141 | 0.223 | 0.212 | 0.448                                        | -0.0230 | 0.252 | 0.242 |
| 0.1                      |               | -0.0433                     | 0.198   | 0.178 | 0.119 | -0.0290                                         | 0.195   | 0.171 | 0.288 | -0.0124                                      | 0.201   | 0.173 | 0.522 | 0.0217                                       | 0.241   | 0.228 | 0.957 |
| 0.2                      |               | -0.0600                     | 0.190   | 0.170 | 0.137 | -0.0366                                         | 0.186   | 0.157 | 0.323 | -0.0100                                      | 0.190   | 0.155 | 0.555 | 0.0527                                       | 0.234   | 0.223 | 0.965 |
| 0.4                      |               | -0.0791                     | 0.180   | 0.163 | 0.158 | -0.0445                                         | 0.175   | 0.142 | 0.356 | -0.0068                                      | 0.178   | 0.136 | 0.594 | 0.0927                                       | 0.219   | 0.216 | 0.971 |
| 0.6                      |               | -0.0899                     | 0.172   | 0.159 | 0.171 | -0.0490                                         | 0.169   | 0.134 | 0.376 | -0.0050                                      | 0.172   | 0.126 | 0.612 | 0.1203                                       | 0.206   | 0.210 | 0.972 |
| 0.8                      |               | -0.0972                     | 0.167   | 0.156 | 0.177 | -0.0517                                         | 0.164   | 0.129 | 0.389 | -0.0039                                      | 0.167   | 0.119 | 0.621 | 0.1431                                       | 0.191   | 0.205 | 0.975 |
| 1                        |               | -0.1029                     | 0.162   | 0.154 | 0.180 | -0.0536                                         | 0.161   | 0.126 | 0.395 | -0.0031                                      | 0.164   | 0.114 | 0.627 | 0.1662                                       | 0.169   | 0.200 | 0.976 |

**Table A8. Impact of  $\alpha_0$  and  $\omega$  on the operating characteristics for scenarios S5 to S8 (Weibull distribution for historical and new data, negative prior-data conflict), with  $\sigma_H^2$  equivalent to 66 events.**

| Control arm: negative prior-data conflict |          |                             |       |       |       |                                                 |       |       |       |                                              |       |       |       |                                              |       |       |       |
|-------------------------------------------|----------|-----------------------------|-------|-------|-------|-------------------------------------------------|-------|-------|-------|----------------------------------------------|-------|-------|-------|----------------------------------------------|-------|-------|-------|
| Treatment effect<br>Parameters            |          | S5: Null scenario<br>HR = 1 |       |       |       | S6: Disappointing effect scenario<br>HR = 0.886 |       |       |       | S7: Historical effect scenario<br>HR = 0.786 |       |       |       | S8: Anticipated effect scenario<br>HR = 0.55 |       |       |       |
| $\alpha_0$                                | $\omega$ | Bias                        | SD    | RMSE  | Alpha | Bias                                            | SD    | RMSE  | Power | Bias                                         | SD    | RMSE  | Power | Bias                                         | SD    | RMSE  | Power |
| 0                                         | 0        | 0.0003                      | 0.241 | 0.243 | 0.104 | 0.0008                                          | 0.240 | 0.243 | 0.224 | 0.0036                                       | 0.245 | 0.247 | 0.382 | -0.0024                                      | 0.263 | 0.264 | 0.849 |
|                                           | 0.1      | -0.0325                     | 0.227 | 0.221 | 0.134 | -0.0217                                         | 0.221 | 0.209 | 0.277 | 0.0035                                       | 0.223 | 0.207 | 0.448 | 0.0456                                       | 0.251 | 0.253 | 0.882 |
|                                           | 0.2      | -0.0528                     | 0.217 | 0.210 | 0.151 | -0.0323                                         | 0.209 | 0.190 | 0.308 | 0.0035                                       | 0.211 | 0.185 | 0.478 | 0.0758                                       | 0.242 | 0.247 | 0.902 |
|                                           | 0.4      | -0.0773                     | 0.202 | 0.195 | 0.171 | -0.0444                                         | 0.194 | 0.169 | 0.345 | 0.0034                                       | 0.195 | 0.160 | 0.513 | 0.1150                                       | 0.227 | 0.240 | 0.919 |
|                                           | 0.6      | -0.0926                     | 0.192 | 0.186 | 0.182 | -0.0515                                         | 0.185 | 0.156 | 0.362 | 0.0034                                       | 0.186 | 0.144 | 0.534 | 0.1425                                       | 0.213 | 0.235 | 0.927 |
|                                           | 0.8      | -0.1042                     | 0.183 | 0.178 | 0.192 | -0.0564                                         | 0.178 | 0.146 | 0.375 | 0.0032                                       | 0.179 | 0.134 | 0.550 | 0.1648                                       | 0.198 | 0.231 | 0.930 |
|                                           | 1        | -0.1151                     | 0.173 | 0.171 | 0.196 | -0.0603                                         | 0.172 | 0.139 | 0.386 | 0.0028                                       | 0.174 | 0.124 | 0.552 | 0.1884                                       | 0.177 | 0.224 | 0.932 |
| 0.3                                       | 0        | 0.0798                      | 0.216 | 0.213 | 0.038 | 0.0755                                          | 0.217 | 0.213 | 0.115 | 0.0619                                       | 0.223 | 0.221 | 0.265 | 0.0813                                       | 0.243 | 0.239 | 0.841 |
|                                           | 0.1      | 0.0388                      | 0.209 | 0.190 | 0.052 | 0.0460                                          | 0.203 | 0.181 | 0.154 | 0.0602                                       | 0.204 | 0.189 | 0.327 | 0.1239                                       | 0.227 | 0.239 | 0.880 |
|                                           | 0.2      | 0.0151                      | 0.202 | 0.177 | 0.062 | 0.0302                                          | 0.194 | 0.163 | 0.180 | 0.0599                                       | 0.193 | 0.170 | 0.362 | 0.1482                                       | 0.217 | 0.240 | 0.897 |
|                                           | 0.4      | -0.0134                     | 0.191 | 0.160 | 0.074 | 0.0130                                          | 0.182 | 0.142 | 0.205 | 0.0538                                       | 0.181 | 0.150 | 0.398 | 0.1769                                       | 0.202 | 0.242 | 0.914 |
|                                           | 0.6      | -0.0316                     | 0.182 | 0.147 | 0.080 | 0.0033                                          | 0.174 | 0.129 | 0.221 | 0.0503                                       | 0.174 | 0.139 | 0.418 | 0.1947                                       | 0.190 | 0.244 | 0.920 |
|                                           | 0.8      | -0.0452                     | 0.174 | 0.137 | 0.086 | -0.0033                                         | 0.169 | 0.120 | 0.228 | 0.0481                                       | 0.169 | 0.131 | 0.431 | 0.2078                                       | 0.180 | 0.245 | 0.928 |
|                                           | 1        | -0.0567                     | 0.164 | 0.127 | 0.087 | -0.0082                                         | 0.164 | 0.113 | 0.236 | 0.0465                                       | 0.166 | 0.125 | 0.441 | 0.2192                                       | 0.169 | 0.246 | 0.928 |
| 0.6                                       | 0        | 0.1150                      | 0.205 | 0.216 | 0.020 | 0.1124                                          | 0.206 | 0.216 | 0.075 | 0.1169                                       | 0.212 | 0.224 | 0.206 | 0.1212                                       | 0.233 | 0.245 | 0.824 |
|                                           | 0.1      | 0.0739                      | 0.201 | 0.192 | 0.030 | 0.0796                                          | 0.195 | 0.184 | 0.107 | 0.0991                                       | 0.195 | 0.194 | 0.264 | 0.1593                                       | 0.215 | 0.248 | 0.867 |
|                                           | 0.2      | 0.0497                      | 0.196 | 0.176 | 0.038 | 0.0622                                          | 0.187 | 0.166 | 0.124 | 0.0904                                       | 0.186 | 0.177 | 0.296 | 0.1802                                       | 0.205 | 0.250 | 0.889 |
|                                           | 0.4      | 0.0194                      | 0.186 | 0.156 | 0.045 | 0.0430                                          | 0.177 | 0.144 | 0.144 | 0.0817                                       | 0.175 | 0.158 | 0.329 | 0.2038                                       | 0.191 | 0.254 | 0.904 |
|                                           | 0.6      | 0.0001                      | 0.178 | 0.140 | 0.050 | 0.0320                                          | 0.170 | 0.130 | 0.155 | 0.0768                                       | 0.169 | 0.147 | 0.348 | 0.2178                                       | 0.181 | 0.257 | 0.911 |
|                                           | 0.8      | -0.0143                     | 0.169 | 0.127 | 0.050 | 0.0247                                          | 0.164 | 0.120 | 0.162 | 0.0736                                       | 0.165 | 0.140 | 0.359 | 0.2277                                       | 0.173 | 0.258 | 0.917 |
|                                           | 1        | -0.0271                     | 0.160 | 0.114 | 0.054 | 0.0191                                          | 0.160 | 0.112 | 0.168 | 0.0713                                       | 0.161 | 0.134 | 0.368 | 0.2359                                       | 0.165 | 0.260 | 0.918 |
| 1                                         | 0        | 0.1407                      | 0.196 | 0.224 | 0.014 | 0.1395                                          | 0.198 | 0.225 | 0.056 | 0.1448                                       | 0.204 | 0.233 | 0.168 | 0.1503                                       | 0.225 | 0.255 | 0.811 |
|                                           | 0.1      | 0.1006                      | 0.195 | 0.199 | 0.019 | 0.1054                                          | 0.189 | 0.193 | 0.080 | 0.1243                                       | 0.189 | 0.205 | 0.218 | 0.1849                                       | 0.207 | 0.259 | 0.853 |
|                                           | 0.2      | 0.0763                      | 0.191 | 0.183 | 0.025 | 0.0871                                          | 0.183 | 0.175 | 0.095 | 0.1141                                       | 0.181 | 0.188 | 0.250 | 0.2032                                       | 0.197 | 0.262 | 0.872 |
|                                           | 0.4      | 0.0454                      | 0.183 | 0.160 | 0.029 | 0.0666                                          | 0.173 | 0.152 | 0.111 | 0.1034                                       | 0.171 | 0.169 | 0.283 | 0.2232                                       | 0.184 | 0.266 | 0.891 |
|                                           | 0.6      | 0.0251                      | 0.175 | 0.142 | 0.032 | 0.0546                                          | 0.167 | 0.137 | 0.121 | 0.0975                                       | 0.165 | 0.158 | 0.296 | 0.2347                                       | 0.175 | 0.269 | 0.900 |
|                                           | 0.8      | 0.0096                      | 0.166 | 0.127 | 0.036 | 0.0465                                          | 0.161 | 0.126 | 0.123 | 0.0938                                       | 0.161 | 0.151 | 0.306 | 0.2428                                       | 0.168 | 0.270 | 0.904 |
|                                           | 1        | -0.0042                     | 0.157 | 0.110 | 0.035 | 0.0404                                          | 0.157 | 0.116 | 0.129 | 0.0913                                       | 0.158 | 0.145 | 0.314 | 0.2489                                       | 0.162 | 0.272 | 0.908 |

**Table A9. Impact of  $\alpha_0$  and  $\omega$  on the operating characteristics for scenarios S9 to S12 (Weibull distribution for historical and new data, positive prior-data conflict), with  $\sigma_H^2$  equivalent to 66 events.**

| Control arm: positive prior-data conflict |          |                             |         |       |       |                                                  |         |       |       |                                               |         |       |       |                                                |         |       |       |
|-------------------------------------------|----------|-----------------------------|---------|-------|-------|--------------------------------------------------|---------|-------|-------|-----------------------------------------------|---------|-------|-------|------------------------------------------------|---------|-------|-------|
| Treatment effect<br>Parameters            |          | S9: Null scenario<br>HR = 1 |         |       |       | S10: Disappointing effect scenario<br>HR = 0.886 |         |       |       | S11: Historical effect scenario<br>HR = 0.786 |         |       |       | S12: Anticipated effect scenario,<br>HR = 0.55 |         |       |       |
| $\alpha_0$                                | $\omega$ | Bias                        | SD      | RMSE  | Alpha | Bias                                             | SD      | RMSE  | Power | Bias                                          | SD      | RMSE  | Power | Bias                                           | SD      | RMSE  | Power |
| 0                                         | 0        | 0.0009                      | 0.281   | 0.280 | 0.102 | -0.0003                                          | 0.280   | 0.284 | 0.201 | 0.0008                                        | 0.286   | 0.291 | 0.354 | -0.0089                                        | 0.315   | 0.315 | 0.764 |
|                                           | 0.1      | -0.0360                     | 0.263   | 0.250 | 0.130 | -0.0221                                          | 0.256   | 0.240 | 0.252 | 0.0008                                        | 0.262   | 0.241 | 0.412 | 0.0430                                         | 0.300   | 0.294 | 0.796 |
|                                           | 0.2      | -0.0584                     | 0.249   | 0.233 | 0.152 | -0.0338                                          | 0.240   | 0.216 | 0.276 | 0.0007                                        | 0.245   | 0.212 | 0.450 | 0.0767                                         | 0.288   | 0.283 | 0.819 |
|                                           | 0.4      | -0.0867                     | 0.230   | 0.214 | 0.177 | -0.0477                                          | 0.219   | 0.186 | 0.309 | 0.0005                                        | 0.223   | 0.177 | 0.487 | 0.1224                                         | 0.266   | 0.270 | 0.844 |
|                                           | 0.6      | -0.1053                     | 0.215   | 0.201 | 0.192 | -0.0567                                          | 0.205   | 0.167 | 0.332 | 0.0004                                        | 0.209   | 0.154 | 0.510 | 0.1557                                         | 0.246   | 0.261 | 0.861 |
|                                           | 0.8      | -0.1198                     | 0.202   | 0.191 | 0.201 | -0.0632                                          | 0.195   | 0.153 | 0.341 | 0.0002                                        | 0.198   | 0.137 | 0.523 | 0.1845                                         | 0.226   | 0.254 | 0.867 |
|                                           | 1        | -0.1333                     | 0.187   | 0.182 | 0.210 | -0.0688                                          | 0.184   | 0.141 | 0.353 | 0.0001                                        | 0.187   | 0.123 | 0.535 | 0.2167                                         | 0.192   | 0.247 | 0.872 |
|                                           | 0.3      | 0                           | -0.0605 | 0.246 | 0.237 | 0.132                                            | -0.0640 | 0.248 | 0.244 | 0.274                                         | -0.0616 | 0.256 | 0.250 | 0.481                                          | -0.0817 | 0.287 | 0.286 |
| 0.1                                       |          | -0.0885                     | 0.227   | 0.216 | 0.169 | -0.0741                                          | 0.225   | 0.208 | 0.339 | -0.0489                                       | 0.234   | 0.206 | 0.524 | -0.0249                                        | 0.279   | 0.268 | 0.924 |
| 0.2                                       |          | -0.1042                     | 0.215   | 0.206 | 0.193 | -0.0784                                          | 0.212   | 0.190 | 0.377 | -0.0416                                       | 0.220   | 0.182 | 0.560 | 0.0121                                         | 0.271   | 0.258 | 0.938 |
| 0.4                                       |          | -0.1218                     | 0.200   | 0.197 | 0.220 | -0.0833                                          | 0.196   | 0.170 | 0.414 | -0.0339                                       | 0.203   | 0.155 | 0.597 | 0.0625                                         | 0.255   | 0.242 | 0.952 |
| 0.6                                       |          | -0.1322                     | 0.190   | 0.192 | 0.240 | -0.0858                                          | 0.186   | 0.159 | 0.433 | -0.0291                                       | 0.192   | 0.138 | 0.618 | 0.0995                                         | 0.237   | 0.230 | 0.957 |
| 0.8                                       |          | -0.1395                     | 0.183   | 0.188 | 0.248 | -0.0874                                          | 0.180   | 0.151 | 0.445 | -0.0261                                       | 0.184   | 0.127 | 0.629 | 0.1321                                         | 0.217   | 0.218 | 0.960 |
| 1                                         |          | -0.1452                     | 0.176   | 0.187 | 0.260 | -0.0887                                          | 0.175   | 0.146 | 0.454 | -0.0236                                       | 0.177   | 0.118 | 0.639 | 0.1696                                         | 0.182   | 0.203 | 0.963 |
| 0.6                                       |          | 0                           | -0.0892 | 0.231 | 0.234 | 0.163                                            | -0.0938 | 0.235 | 0.242 | 0.336                                         | -0.0926 | 0.243 | 0.248 | 0.562                                          | -0.1145 | 0.275 | 0.287 |
|                                           | 0.1      | -0.1120                     | 0.213   | 0.216 | 0.204 | -0.0978                                          | 0.214   | 0.209 | 0.408 | -0.0739                                       | 0.224   | 0.206 | 0.605 | -0.0586                                        | 0.271   | 0.269 | 0.961 |
|                                           | 0.2      | -0.1240                     | 0.203   | 0.208 | 0.236 | -0.0989                                          | 0.201   | 0.192 | 0.445 | -0.0642                                       | 0.211   | 0.183 | 0.642 | -0.0218                                        | 0.265   | 0.257 | 0.970 |
|                                           | 0.4      | -0.1374                     | 0.189   | 0.200 | 0.270 | -0.1001                                          | 0.187   | 0.174 | 0.479 | -0.0532                                       | 0.195   | 0.157 | 0.676 | 0.0296                                         | 0.251   | 0.238 | 0.979 |
|                                           | 0.6      | -0.1450                     | 0.181   | 0.197 | 0.289 | -0.1007                                          | 0.179   | 0.164 | 0.501 | -0.0472                                       | 0.186   | 0.141 | 0.692 | 0.0683                                         | 0.235   | 0.222 | 0.981 |
|                                           | 0.8      | -0.1501                     | 0.175   | 0.195 | 0.296 | -0.1011                                          | 0.174   | 0.158 | 0.509 | -0.0428                                       | 0.179   | 0.130 | 0.700 | 0.1031                                         | 0.215   | 0.205 | 0.981 |
|                                           | 1        | -0.1539                     | 0.170   | 0.193 | 0.304 | -0.1013                                          | 0.170   | 0.154 | 0.519 | -0.0397                                       | 0.173   | 0.121 | 0.707 | 0.1448                                         | 0.177   | 0.182 | 0.983 |
|                                           | 1        | 0                           | -0.1108 | 0.221 | 0.238 | 0.194                                            | -0.1162 | 0.226 | 0.246 | 0.400                                         | -0.1158 | 0.235 | 0.253 | 0.628                                          | -0.1391 | 0.268 | 0.293 |
| 0.1                                       |          | -0.1294                     | 0.204   | 0.221 | 0.246 | -0.1158                                          | 0.206   | 0.215 | 0.467 | -0.0936                                       | 0.217   | 0.212 | 0.671 | -0.0851                                        | 0.265   | 0.275 | 0.979 |
| 0.2                                       |          | -0.1389                     | 0.194   | 0.213 | 0.278 | -0.1149                                          | 0.195   | 0.198 | 0.499 | -0.0820                                       | 0.205   | 0.189 | 0.703 | -0.0488                                        | 0.261   | 0.261 | 0.984 |
| 0.4                                       |          | -0.1497                     | 0.182   | 0.207 | 0.313 | -0.1136                                          | 0.182   | 0.181 | 0.535 | -0.0690                                       | 0.191   | 0.163 | 0.731 | 0.0027                                         | 0.248   | 0.240 | 0.986 |
| 0.6                                       |          | -0.1554                     | 0.175   | 0.204 | 0.328 | -0.1130                                          | 0.175   | 0.172 | 0.556 | -0.0618                                       | 0.182   | 0.147 | 0.743 | 0.0423                                         | 0.233   | 0.220 | 0.988 |
| 0.8                                       |          | -0.1592                     | 0.170   | 0.202 | 0.338 | -0.1124                                          | 0.170   | 0.166 | 0.568 | -0.0567                                       | 0.175   | 0.136 | 0.756 | 0.0790                                         | 0.213   | 0.200 | 0.988 |
| 1                                         |          | -0.1621                     | 0.166   | 0.200 | 0.346 | -0.1120                                          | 0.166   | 0.162 | 0.574 | -0.0528                                       | 0.169   | 0.127 | 0.758 | 0.1251                                         | 0.173   | 0.167 | 0.989 |

**Table A10. Impact of  $\alpha_0$  and  $\omega$  on the operating characteristics for scenarios S1 to S4 (Weibull distribution for historical and new data, commensurate control arm), with  $\sigma_H^2$  equivalent to 22 events.**

| Treatment effect<br>Parameters |          | Commensurate control arm    |         |       |       |                                                 |         |       |       |                                              |         |       |       |                                               |         |       |       |
|--------------------------------|----------|-----------------------------|---------|-------|-------|-------------------------------------------------|---------|-------|-------|----------------------------------------------|---------|-------|-------|-----------------------------------------------|---------|-------|-------|
|                                |          | S1: Null scenario<br>HR = 1 |         |       |       | S2: Disappointing effect scenario<br>HR = 0.886 |         |       |       | S3: Historical effect scenario<br>HR = 0.786 |         |       |       | S4: Anticipated effect scenario,<br>HR = 0.55 |         |       |       |
| $\alpha_0$                     | $\omega$ | Bias                        | SD      | RMSE  | Alpha | Bias                                            | SD      | RMSE  | Power | Bias                                         | SD      | RMSE  | Power | Bias                                          | SD      | RMSE  | Power |
| 0                              | 0        | 0.0024                      | 0.263   | 0.262 | 0.100 | 0.0015                                          | 0.268   | 0.267 | 0.208 | 0.0022                                       | 0.275   | 0.275 | 0.359 | -0.0075                                       | 0.304   | 0.298 | 0.794 |
|                                | 0.1      | -0.0171                     | 0.253   | 0.244 | 0.108 | -0.0048                                         | 0.252   | 0.244 | 0.213 | 0.0021                                       | 0.256   | 0.247 | 0.375 | 0.0170                                        | 0.281   | 0.277 | 0.809 |
|                                | 0.2      | -0.0292                     | 0.246   | 0.233 | 0.112 | -0.0111                                         | 0.245   | 0.230 | 0.220 | 0.0020                                       | 0.248   | 0.232 | 0.384 | 0.0371                                        | 0.274   | 0.266 | 0.817 |
|                                | 0.4      | -0.0439                     | 0.238   | 0.220 | 0.117 | -0.0186                                         | 0.236   | 0.215 | 0.229 | 0.0016                                       | 0.239   | 0.215 | 0.396 | 0.0632                                        | 0.262   | 0.250 | 0.823 |
|                                | 0.6      | -0.0527                     | 0.232   | 0.212 | 0.118 | -0.0229                                         | 0.231   | 0.205 | 0.232 | 0.0014                                       | 0.233   | 0.206 | 0.401 | 0.0803                                        | 0.253   | 0.239 | 0.826 |
|                                | 0.8      | -0.0588                     | 0.227   | 0.206 | 0.121 | -0.0259                                         | 0.227   | 0.199 | 0.237 | 0.0013                                       | 0.230   | 0.199 | 0.405 | 0.0929                                        | 0.245   | 0.230 | 0.828 |
|                                | 1        | -0.0630                     | 0.224   | 0.201 | 0.122 | -0.0280                                         | 0.224   | 0.195 | 0.240 | 0.0011                                       | 0.227   | 0.194 | 0.407 | 0.1034                                        | 0.237   | 0.223 | 0.829 |
|                                | 0.3      | 0                           | -0.0058 | 0.232 | 0.214 | 0.084                                           | -0.0071 | 0.238 | 0.220 | 0.211                                        | -0.0070 | 0.245 | 0.231 | 0.396                                         | -0.0158 | 0.274 | 0.259 |
| 0.1                            |          | -0.0225                     | 0.225   | 0.201 | 0.092 | -0.0120                                         | 0.227   | 0.203 | 0.215 | -0.0069                                      | 0.231   | 0.208 | 0.415 | 0.0069                                        | 0.258   | 0.240 | 0.896 |
| 0.2                            |          | -0.0324                     | 0.220   | 0.194 | 0.097 | -0.0166                                         | 0.221   | 0.194 | 0.225 | -0.0069                                      | 0.225   | 0.197 | 0.425 | 0.0262                                        | 0.252   | 0.231 | 0.900 |
| 0.4                            |          | -0.0432                     | 0.214   | 0.186 | 0.101 | -0.0217                                         | 0.215   | 0.183 | 0.233 | -0.0060                                      | 0.218   | 0.185 | 0.436 | 0.0505                                        | 0.242   | 0.218 | 0.905 |
| 0.6                            |          | -0.0494                     | 0.210   | 0.181 | 0.104 | -0.0245                                         | 0.211   | 0.178 | 0.237 | -0.0052                                      | 0.214   | 0.179 | 0.447 | 0.0658                                        | 0.234   | 0.208 | 0.907 |
| 0.8                            |          | -0.0535                     | 0.207   | 0.178 | 0.107 | -0.0262                                         | 0.209   | 0.174 | 0.242 | -0.0048                                      | 0.212   | 0.174 | 0.445 | 0.0768                                        | 0.228   | 0.201 | 0.909 |
| 1                              |          | -0.0564                     | 0.205   | 0.176 | 0.109 | -0.0275                                         | 0.207   | 0.171 | 0.242 | -0.0046                                      | 0.210   | 0.171 | 0.452 | 0.0857                                        | 0.221   | 0.195 | 0.911 |
| 0.6                            |          | 0                           | -0.0095 | 0.219 | 0.200 | 0.082                                           | -0.0108 | 0.225 | 0.206 | 0.222                                        | -0.0111 | 0.233 | 0.218 | 0.418                                         | -0.0199 | 0.261 | 0.248 |
|                                | 0.1      | -0.0246                     | 0.213   | 0.190 | 0.090 | -0.0147                                         | 0.215   | 0.191 | 0.224 | -0.0110                                      | 0.220   | 0.198 | 0.443 | 0.0022                                        | 0.248   | 0.230 | 0.926 |
|                                | 0.2      | -0.0332                     | 0.208   | 0.184 | 0.097 | -0.0188                                         | 0.210   | 0.183 | 0.235 | -0.0100                                      | 0.215   | 0.188 | 0.454 | 0.0206                                        | 0.242   | 0.220 | 0.931 |
|                                | 0.4      | -0.0428                     | 0.203   | 0.177 | 0.101 | -0.0230                                         | 0.205   | 0.174 | 0.244 | -0.0084                                      | 0.209   | 0.177 | 0.466 | 0.0440                                        | 0.233   | 0.208 | 0.934 |
|                                | 0.6      | -0.0480                     | 0.200   | 0.173 | 0.103 | -0.0252                                         | 0.202   | 0.170 | 0.249 | -0.0076                                      | 0.205   | 0.171 | 0.475 | 0.0587                                        | 0.226   | 0.199 | 0.937 |
|                                | 0.8      | -0.0514                     | 0.198   | 0.171 | 0.106 | -0.0267                                         | 0.200   | 0.167 | 0.252 | -0.0069                                      | 0.203   | 0.168 | 0.476 | 0.0691                                        | 0.220   | 0.192 | 0.938 |
|                                | 1        | -0.0538                     | 0.196   | 0.169 | 0.106 | -0.0276                                         | 0.199   | 0.165 | 0.252 | -0.0066                                      | 0.202   | 0.165 | 0.477 | 0.0772                                        | 0.214   | 0.187 | 0.939 |
|                                | 1        | 0                           | -0.0121 | 0.210 | 0.193 | 0.087                                           | -0.0137 | 0.216 | 0.200 | 0.233                                        | -0.0141 | 0.223 | 0.212 | 0.448                                         | -0.0230 | 0.252 | 0.242 |
| 0.1                            |          | -0.0260                     | 0.204   | 0.184 | 0.095 | -0.0167                                         | 0.207   | 0.186 | 0.236 | -0.0136                                      | 0.212   | 0.192 | 0.467 | -0.0015                                       | 0.241   | 0.225 | 0.944 |
| 0.2                            |          | -0.0337                     | 0.200   | 0.179 | 0.100 | -0.0202                                         | 0.203   | 0.178 | 0.245 | -0.0121                                      | 0.207   | 0.183 | 0.479 | 0.0166                                        | 0.235   | 0.216 | 0.947 |
| 0.4                            |          | -0.0428                     | 0.196   | 0.173 | 0.104 | -0.0239                                         | 0.198   | 0.170 | 0.256 | -0.0102                                      | 0.202   | 0.173 | 0.491 | 0.0390                                        | 0.227   | 0.203 | 0.949 |
| 0.6                            |          | -0.0474                     | 0.193   | 0.170 | 0.106 | -0.0258                                         | 0.195   | 0.166 | 0.259 | -0.0092                                      | 0.199   | 0.168 | 0.495 | 0.0533                                        | 0.220   | 0.194 | 0.953 |
| 0.8                            |          | -0.0504                     | 0.191   | 0.167 | 0.108 | -0.0270                                         | 0.194   | 0.164 | 0.262 | -0.0087                                      | 0.197   | 0.165 | 0.500 | 0.0633                                        | 0.214   | 0.188 | 0.952 |
| 1                              |          | -0.0525                     | 0.190   | 0.166 | 0.111 | -0.0279                                         | 0.192   | 0.162 | 0.264 | -0.0083                                      | 0.195   | 0.163 | 0.502 | 0.0710                                        | 0.208   | 0.182 | 0.954 |

**Table A11. Impact of  $\alpha_0$  and  $\omega$  on the operating characteristics for scenarios S5 to S8 (Weibull distribution for historical and new data, negative prior-data conflict), with  $\sigma_H^2$  equivalent to 22 events.**

| Control arm: negative prior-data conflict |               |                             |        |       |       |                                                 |        |       |       |                                              |        |       |       |                                               |        |       |       |
|-------------------------------------------|---------------|-----------------------------|--------|-------|-------|-------------------------------------------------|--------|-------|-------|----------------------------------------------|--------|-------|-------|-----------------------------------------------|--------|-------|-------|
| Treatment effect                          |               | S5: Null scenario<br>HR = 1 |        |       |       | S6: Disappointing effect scenario<br>HR = 0.886 |        |       |       | S7: Historical effect scenario<br>HR = 0.786 |        |       |       | S8: Anticipated effect scenario,<br>HR = 0.55 |        |       |       |
| Parameters                                |               | Bias                        | SD     | RMSE  | Alpha | Bias                                            | SD     | RMSE  | Power | Bias                                         | SD     | RMSE  | Power | Bias                                          | SD     | RMSE  | Power |
| $\alpha_0$<br>0                           | $\omega$<br>0 | 0.0003                      | 0.241  | 0.243 | 0.104 | 0.0008                                          | 0.240  | 0.243 | 0.224 | 0.0036                                       | 0.245  | 0.247 | 0.382 | -0.0024                                       | 0.263  | 0.264 | 0.849 |
|                                           | 0.1           | -0.0174                     | 0.233  | 0.228 | 0.110 | -0.0075                                         | 0.231  | 0.225 | 0.229 | 0.0040                                       | 0.236  | 0.227 | 0.405 | 0.0217                                        | 0.256  | 0.251 | 0.858 |
|                                           | 0.2           | -0.0283                     | 0.227  | 0.219 | 0.117 | -0.0132                                         | 0.225  | 0.214 | 0.237 | 0.0040                                       | 0.230  | 0.216 | 0.414 | 0.0394                                        | 0.250  | 0.242 | 0.864 |
|                                           | 0.4           | -0.0411                     | 0.221  | 0.208 | 0.122 | -0.0196                                         | 0.219  | 0.202 | 0.246 | 0.0036                                       | 0.223  | 0.202 | 0.424 | 0.0613                                        | 0.241  | 0.231 | 0.870 |
|                                           | 0.6           | -0.0486                     | 0.216  | 0.201 | 0.124 | -0.0233                                         | 0.214  | 0.195 | 0.254 | 0.0037                                       | 0.218  | 0.195 | 0.430 | 0.0753                                        | 0.234  | 0.223 | 0.873 |
|                                           | 0.8           | -0.0536                     | 0.213  | 0.197 | 0.127 | -0.0258                                         | 0.212  | 0.190 | 0.255 | 0.0038                                       | 0.216  | 0.190 | 0.432 | 0.0853                                        | 0.228  | 0.217 | 0.877 |
|                                           | 1             | -0.0572                     | 0.210  | 0.194 | 0.128 | -0.0272                                         | 0.210  | 0.187 | 0.259 | 0.0038                                       | 0.214  | 0.186 | 0.436 | 0.0937                                        | 0.223  | 0.211 | 0.874 |
|                                           | 0.3           | 0                           | 0.0798 | 0.216 | 0.213 | 0.038                                           | 0.0755 | 0.217 | 0.213 | 0.115                                        | 0.0619 | 0.223 | 0.221 | 0.265                                         | 0.0813 | 0.243 | 0.239 |
| 0.1                                       |               | 0.0576                      | 0.211  | 0.196 | 0.037 | 0.0662                                          | 0.211  | 0.198 | 0.120 | 0.0577                                       | 0.216  | 0.206 | 0.283 | 0.1003                                        | 0.235  | 0.233 | 0.852 |
| 0.2                                       |               | 0.0457                      | 0.208  | 0.186 | 0.041 | 0.0585                                          | 0.207  | 0.188 | 0.127 | 0.0554                                       | 0.211  | 0.196 | 0.291 | 0.1135                                        | 0.229  | 0.231 | 0.861 |
| 0.4                                       |               | 0.0320                      | 0.202  | 0.175 | 0.042 | 0.0501                                          | 0.201  | 0.177 | 0.131 | 0.0530                                       | 0.205  | 0.187 | 0.300 | 0.1289                                        | 0.221  | 0.228 | 0.865 |
| 0.6                                       |               | 0.0241                      | 0.199  | 0.167 | 0.044 | 0.0454                                          | 0.198  | 0.171 | 0.134 | 0.0518                                       | 0.202  | 0.182 | 0.308 | 0.1379                                        | 0.216  | 0.226 | 0.868 |
| 0.8                                       |               | 0.0188                      | 0.196  | 0.162 | 0.044 | 0.0425                                          | 0.196  | 0.167 | 0.137 | 0.0510                                       | 0.200  | 0.178 | 0.310 | 0.1442                                        | 0.212  | 0.224 | 0.871 |
| 1                                         |               | 0.0151                      | 0.194  | 0.159 | 0.045 | 0.0404                                          | 0.195  | 0.164 | 0.137 | 0.0500                                       | 0.199  | 0.174 | 0.312 | 0.1484                                        | 0.209  | 0.223 | 0.873 |
| 0.6                                       |               | 0                           | 0.1150 | 0.205 | 0.216 | 0.020                                           | 0.1124 | 0.206 | 0.216 | 0.075                                        | 0.1169 | 0.212 | 0.224 | 0.206                                         | 0.1212 | 0.233 | 0.245 |
|                                           | 0.1           | 0.0928                      | 0.201  | 0.198 | 0.021 | 0.1017                                          | 0.201  | 0.202 | 0.079 | 0.1095                                       | 0.206  | 0.209 | 0.222 | 0.1377                                        | 0.224  | 0.242 | 0.838 |
|                                           | 0.2           | 0.0809                      | 0.198  | 0.188 | 0.022 | 0.0934                                          | 0.197  | 0.192 | 0.083 | 0.1055                                       | 0.202  | 0.201 | 0.231 | 0.1487                                        | 0.219  | 0.241 | 0.844 |
|                                           | 0.4           | 0.0670                      | 0.194  | 0.175 | 0.023 | 0.0843                                          | 0.193  | 0.181 | 0.090 | 0.1013                                       | 0.197  | 0.191 | 0.241 | 0.1611                                        | 0.212  | 0.239 | 0.849 |
|                                           | 0.6           | 0.0589                      | 0.190  | 0.167 | 0.024 | 0.0794                                          | 0.190  | 0.175 | 0.092 | 0.0991                                       | 0.194  | 0.187 | 0.244 | 0.1683                                        | 0.208  | 0.239 | 0.854 |
|                                           | 0.8           | 0.0537                      | 0.188  | 0.162 | 0.025 | 0.0762                                          | 0.189  | 0.171 | 0.092 | 0.0977                                       | 0.193  | 0.184 | 0.248 | 0.1729                                        | 0.204  | 0.238 | 0.855 |
|                                           | 1             | 0.0498                      | 0.186  | 0.158 | 0.024 | 0.0740                                          | 0.187  | 0.168 | 0.093 | 0.0968                                       | 0.191  | 0.182 | 0.252 | 0.1763                                        | 0.202  | 0.238 | 0.857 |
|                                           | 1             | 0                           | 0.1407 | 0.196 | 0.224 | 0.014                                           | 0.1395 | 0.198 | 0.225 | 0.056                                        | 0.1448 | 0.204 | 0.233 | 0.168                                         | 0.1503 | 0.225 | 0.255 |
| 0.1                                       |               | 0.1189                      | 0.193  | 0.206 | 0.013 | 0.1280                                          | 0.194  | 0.211 | 0.059 | 0.1361                                       | 0.198  | 0.219 | 0.182 | 0.1650                                        | 0.217  | 0.253 | 0.822 |
| 0.2                                       |               | 0.1071                      | 0.191  | 0.195 | 0.015 | 0.1195                                          | 0.191  | 0.202 | 0.062 | 0.1315                                       | 0.195  | 0.211 | 0.190 | 0.1744                                        | 0.212  | 0.253 | 0.828 |
| 0.4                                       |               | 0.0929                      | 0.187  | 0.182 | 0.016 | 0.1101                                          | 0.187  | 0.191 | 0.065 | 0.1266                                       | 0.191  | 0.202 | 0.196 | 0.1851                                        | 0.205  | 0.253 | 0.833 |
| 0.6                                       |               | 0.0848                      | 0.184  | 0.174 | 0.016 | 0.1049                                          | 0.184  | 0.184 | 0.068 | 0.1240                                       | 0.188  | 0.198 | 0.202 | 0.1909                                        | 0.202  | 0.253 | 0.837 |
| 0.8                                       |               | 0.0796                      | 0.182  | 0.168 | 0.017 | 0.1016                                          | 0.183  | 0.180 | 0.070 | 0.1225                                       | 0.187  | 0.195 | 0.204 | 0.1949                                        | 0.199  | 0.253 | 0.840 |
| 1                                         |               | 0.0756                      | 0.183  | 0.164 | 0.017 | 0.0993                                          | 0.181  | 0.177 | 0.070 | 0.1212                                       | 0.186  | 0.193 | 0.206 | 0.1976                                        | 0.197  | 0.253 | 0.841 |

**Table A12. Impact of  $\alpha_0$  and  $\omega$  on the operating characteristics for scenarios S9 to S12 (Weibull distribution for historical and new data, positive prior-data conflict), with  $\sigma_H^2$  equivalent to 22 events.**

| Control arm: positive prior-data conflict |          |                             |       |       |       |                                                  |       |       |       |                                               |       |       |       |                                                |       |       |       |
|-------------------------------------------|----------|-----------------------------|-------|-------|-------|--------------------------------------------------|-------|-------|-------|-----------------------------------------------|-------|-------|-------|------------------------------------------------|-------|-------|-------|
| Treatment effect<br>Parameters            |          | S9: Null scenario<br>HR = 1 |       |       |       | S10: Disappointing effect scenario<br>HR = 0.886 |       |       |       | S11: Historical effect scenario<br>HR = 0.786 |       |       |       | S12: Anticipated effect scenario,<br>HR = 0.55 |       |       |       |
| $\alpha_0$                                | $\omega$ | Bias                        | SD    | RMSE  | Alpha | Bias                                             | SD    | RMSE  | Power | Bias                                          | SD    | RMSE  | Power | Bias                                           | SD    | RMSE  | Power |
| 0                                         | 0        | 0.0009                      | 0.281 | 0.280 | 0.102 | -0.0003                                          | 0.280 | 0.284 | 0.201 | 0.0008                                        | 0.286 | 0.291 | 0.354 | -0.0089                                        | 0.315 | 0.315 | 0.764 |
|                                           | 0.1      | -0.0197                     | 0.270 | 0.260 | 0.109 | -0.0113                                          | 0.268 | 0.259 | 0.217 | 0.0007                                        | 0.274 | 0.263 | 0.368 | 0.0182                                         | 0.303 | 0.296 | 0.770 |
|                                           | 0.2      | -0.0327                     | 0.262 | 0.247 | 0.112 | -0.0180                                          | 0.259 | 0.244 | 0.223 | 0.0006                                        | 0.265 | 0.247 | 0.378 | 0.0398                                         | 0.295 | 0.282 | 0.777 |
|                                           | 0.4      | -0.0489                     | 0.252 | 0.232 | 0.117 | -0.0259                                          | 0.249 | 0.225 | 0.232 | 0.0006                                        | 0.254 | 0.226 | 0.387 | 0.0689                                         | 0.281 | 0.264 | 0.783 |
|                                           | 0.6      | -0.0586                     | 0.245 | 0.222 | 0.121 | -0.0306                                          | 0.242 | 0.214 | 0.235 | 0.0006                                        | 0.247 | 0.214 | 0.392 | 0.0881                                         | 0.270 | 0.251 | 0.788 |
|                                           | 0.8      | -0.0655                     | 0.239 | 0.215 | 0.124 | -0.0338                                          | 0.238 | 0.206 | 0.235 | 0.0005                                        | 0.242 | 0.205 | 0.398 | 0.1028                                         | 0.260 | 0.241 | 0.791 |
|                                           | 1        | -0.0706                     | 0.235 | 0.209 | 0.125 | -0.0363                                          | 0.234 | 0.201 | 0.238 | 0.0003                                        | 0.239 | 0.199 | 0.404 | 0.1153                                         | 0.250 | 0.232 | 0.793 |
| 0.3                                       | 0        | -0.0605                     | 0.246 | 0.237 | 0.132 | -0.0640                                          | 0.248 | 0.244 | 0.274 | -0.0616                                       | 0.256 | 0.250 | 0.481 | -0.0817                                        | 0.287 | 0.286 | 0.905 |
|                                           | 0.1      | -0.0739                     | 0.236 | 0.224 | 0.141 | -0.0677                                          | 0.237 | 0.225 | 0.291 | -0.0599                                       | 0.246 | 0.230 | 0.484 | -0.0489                                        | 0.279 | 0.266 | 0.909 |
|                                           | 0.2      | -0.0820                     | 0.230 | 0.218 | 0.147 | -0.0697                                          | 0.231 | 0.215 | 0.299 | -0.0558                                       | 0.239 | 0.217 | 0.495 | -0.0256                                        | 0.272 | 0.251 | 0.914 |
|                                           | 0.4      | -0.0907                     | 0.223 | 0.210 | 0.154 | -0.0719                                          | 0.223 | 0.203 | 0.309 | -0.0508                                       | 0.230 | 0.201 | 0.504 | 0.0051                                         | 0.261 | 0.230 | 0.918 |
|                                           | 0.6      | -0.0957                     | 0.219 | 0.206 | 0.157 | -0.0732                                          | 0.219 | 0.197 | 0.317 | -0.0481                                       | 0.225 | 0.193 | 0.510 | 0.0259                                         | 0.251 | 0.214 | 0.920 |
|                                           | 0.8      | -0.0990                     | 0.216 | 0.203 | 0.159 | -0.0740                                          | 0.216 | 0.193 | 0.320 | -0.0463                                       | 0.222 | 0.187 | 0.515 | 0.0416                                         | 0.242 | 0.200 | 0.921 |
|                                           | 1        | -0.1012                     | 0.214 | 0.201 | 0.162 | -0.0746                                          | 0.214 | 0.191 | 0.321 | -0.0451                                       | 0.220 | 0.183 | 0.517 | 0.0547                                         | 0.232 | 0.188 | 0.923 |
| 0.6                                       | 0        | -0.0892                     | 0.231 | 0.234 | 0.163 | -0.0938                                          | 0.235 | 0.242 | 0.336 | -0.0926                                       | 0.243 | 0.248 | 0.562 | -0.1145                                        | 0.275 | 0.287 | 0.950 |
|                                           | 0.1      | -0.0996                     | 0.223 | 0.224 | 0.174 | -0.0944                                          | 0.225 | 0.225 | 0.357 | -0.0878                                       | 0.234 | 0.230 | 0.566 | -0.0821                                        | 0.269 | 0.266 | 0.951 |
|                                           | 0.2      | -0.1053                     | 0.218 | 0.218 | 0.182 | -0.0949                                          | 0.220 | 0.216 | 0.366 | -0.0823                                       | 0.228 | 0.217 | 0.573 | -0.0585                                        | 0.263 | 0.250 | 0.954 |
|                                           | 0.4      | -0.1116                     | 0.212 | 0.213 | 0.185 | -0.0949                                          | 0.213 | 0.206 | 0.379 | -0.0757                                       | 0.221 | 0.203 | 0.585 | -0.0273                                        | 0.252 | 0.227 | 0.958 |
|                                           | 0.6      | -0.1151                     | 0.208 | 0.210 | 0.191 | -0.0951                                          | 0.209 | 0.201 | 0.385 | -0.0724                                       | 0.216 | 0.194 | 0.594 | -0.0061                                        | 0.243 | 0.208 | 0.958 |
|                                           | 0.8      | -0.1173                     | 0.206 | 0.208 | 0.195 | -0.0951                                          | 0.207 | 0.198 | 0.387 | -0.0700                                       | 0.213 | 0.189 | 0.594 | 0.0102                                         | 0.234 | 0.192 | 0.958 |
|                                           | 1        | -0.1189                     | 0.204 | 0.206 | 0.194 | -0.0954                                          | 0.206 | 0.195 | 0.392 | -0.0684                                       | 0.211 | 0.185 | 0.596 | 0.0240                                         | 0.223 | 0.177 | 0.960 |
| 1                                         | 0        | -0.1108                     | 0.221 | 0.238 | 0.194 | -0.1162                                          | 0.226 | 0.246 | 0.400 | -0.1158                                       | 0.235 | 0.253 | 0.628 | -0.1391                                        | 0.268 | 0.293 | 0.971 |
|                                           | 0.1      | -0.1189                     | 0.214 | 0.229 | 0.208 | -0.1148                                          | 0.217 | 0.231 | 0.415 | -0.1092                                       | 0.226 | 0.235 | 0.632 | -0.1073                                        | 0.262 | 0.272 | 0.973 |
|                                           | 0.2      | -0.1232                     | 0.209 | 0.224 | 0.219 | -0.1139                                          | 0.212 | 0.222 | 0.425 | -0.1028                                       | 0.221 | 0.223 | 0.640 | -0.0843                                        | 0.257 | 0.256 | 0.973 |
|                                           | 0.4      | -0.1282                     | 0.204 | 0.219 | 0.225 | -0.1129                                          | 0.206 | 0.213 | 0.434 | -0.0956                                       | 0.214 | 0.209 | 0.650 | -0.0525                                        | 0.247 | 0.230 | 0.975 |
|                                           | 0.6      | -0.1308                     | 0.201 | 0.217 | 0.231 | -0.1124                                          | 0.203 | 0.208 | 0.439 | -0.0914                                       | 0.210 | 0.200 | 0.657 | -0.0309                                        | 0.237 | 0.209 | 0.976 |
|                                           | 0.8      | -0.1324                     | 0.199 | 0.215 | 0.231 | -0.1120                                          | 0.201 | 0.204 | 0.443 | -0.0887                                       | 0.207 | 0.195 | 0.661 | -0.0140                                        | 0.228 | 0.191 | 0.977 |
|                                           | 1        | -0.1334                     | 0.197 | 0.214 | 0.232 | -0.1118                                          | 0.199 | 0.202 | 0.448 | -0.0868                                       | 0.205 | 0.191 | 0.665 | 0.0004                                         | 0.218 | 0.173 | 0.977 |
