# Supplementary material for: Incorporating individual historical controls and aggregate treatment effect estimates into a Bayesian survival trial: a simulation study
Source: PubMed Central journal article supplement (PMC6480797; doi:10.1186/s12874-019-0714-z), 2019-04-24
Supplement: 12874_2019_714_MOESM11_ESM.pdf [file 12874_2019_714_MOESM11_ESM.pdf]

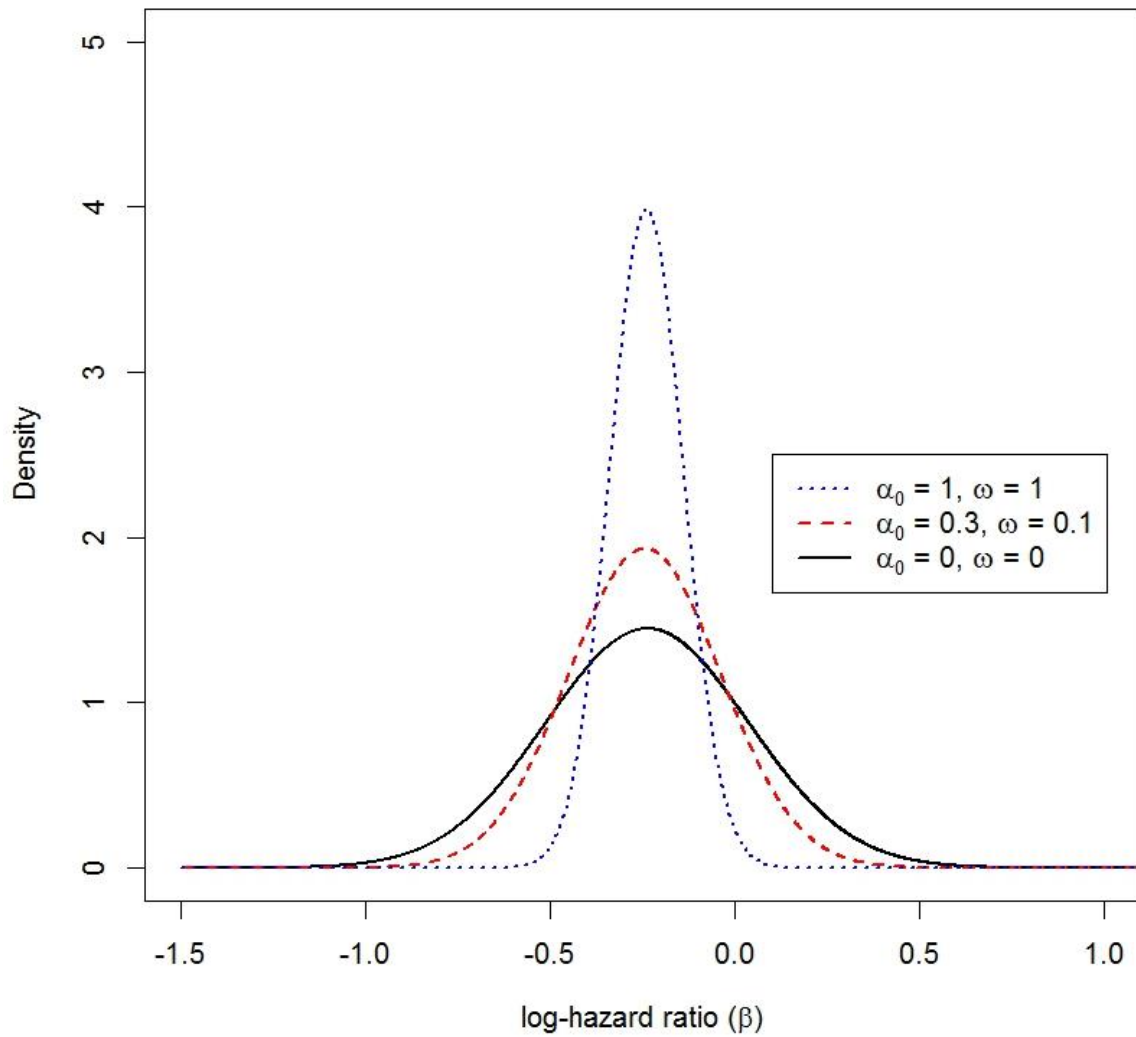

**Figure A7: Posterior distribution of the log-hazard ratio depending on the values of the weighting parameters.**

The figure represents no incorporation of historical data (solid black curve), weighted incorporation of historical data (dashed red curve), and full incorporation of historical data (dot dashed blue curve).
