# Supplementary material for: Incorporating individual historical controls and aggregate treatment effect estimates into a Bayesian survival trial: a simulation study
Source: PubMed Central journal article supplement (PMC6480797; doi:10.1186/s12874-019-0714-z), 2019-04-24
Supplement: 12874_2019_714_MOESM12_ESM.pdf [file 12874_2019_714_MOESM12_ESM.pdf]

**Table A13. Impact of  $\alpha_0$  and  $\omega$  on the operating characteristics for scenarios S25 to S28 (Weibull distribution for historical data / piecewise exponential distribution for new data) with a Bayesian Weibull analysis (W/P/W)**

| Historical data: Weibull survival distribution / New data: piecewise exponential distribution / Bayesian Weibull analysis (W/P/W) |          |                              |         |         |       |                                                  |         |         |       |                                               |         |         |       |                                                |         |         |       |       |       |
|-----------------------------------------------------------------------------------------------------------------------------------|----------|------------------------------|---------|---------|-------|--------------------------------------------------|---------|---------|-------|-----------------------------------------------|---------|---------|-------|------------------------------------------------|---------|---------|-------|-------|-------|
| Treatment effect                                                                                                                  |          | S25: Null scenario<br>HR = 1 |         |         |       | S26: Disappointing effect scenario<br>HR = 0.886 |         |         |       | S27: Historical effect scenario<br>HR = 0.786 |         |         |       | S28: Anticipated effect scenario,<br>HR = 0.55 |         |         |       |       |       |
| Parameters                                                                                                                        |          | Bias                         | SD      | RMSE    | Alpha | Bias                                             | SD      | RMSE    | Power | Bias                                          | SD      | RMSE    | Power | Bias                                           | SD      | RMSE    | Power |       |       |
| $\alpha_0$                                                                                                                        | $\omega$ | 0                            | 0       | -0.0015 | 0.277 | 0.287                                            | 0.113   | -0.0088 | 0.284 | 0.294                                         | 0.220   | -0.0142 | 0.292 | 0.298                                          | 0.358   | -0.0344 | 0.326 | 0.327 | 0.776 |
|                                                                                                                                   |          | 0.1                          | -0.0497 | 0.253   | 0.254 | 0.223                                            | -0.0332 | 0.249   | 0.236 | 0.370                                         | -0.0109 | 0.252   | 0.232 | 0.521                                          | 0.0315  | 0.309   | 0.313 | 0.880 |       |
|                                                                                                                                   |          | 0.2                          | -0.0788 | 0.234   | 0.240 | 0.331                                            | -0.0477 | 0.224   | 0.207 | 0.491                                         | -0.0085 | 0.225   | 0.195 | 0.650                                          | 0.0745  | 0.292   | 0.308 | 0.932 |       |
|                                                                                                                                   |          | 0.4                          | -0.1179 | 0.204   | 0.226 | 0.507                                            | -0.0667 | 0.190   | 0.170 | 0.676                                         | -0.0063 | 0.188   | 0.148 | 0.809                                          | 0.1355  | 0.262   | 0.306 | 0.978 |       |
|                                                                                                                                   |          | 0.6                          | -0.1457 | 0.179   | 0.220 | 0.649                                            | -0.0795 | 0.163   | 0.147 | 0.796                                         | -0.0041 | 0.161   | 0.114 | 0.894                                          | 0.1834  | 0.233   | 0.307 | 0.991 |       |
|                                                                                                                                   |          | 0.8                          | -0.1716 | 0.153   | 0.215 | 0.791                                            | -0.0910 | 0.139   | 0.129 | 0.893                                         | -0.0028 | 0.138   | 0.082 | 0.953                                          | 0.2304  | 0.199   | 0.310 | 0.997 |       |
|                                                                                                                                   |          | 1                            | -0.2071 | 0.106   | 0.211 | 0.967                                            | -0.1045 | 0.107   | 0.112 | 0.992                                         | -0.0016 | 0.108   | 0.039 | 0.997                                          | 0.3125  | 0.112   | 0.315 | 1     |       |
|                                                                                                                                   |          | 0.3                          | 0       | -0.0387 | 0.243 | 0.238                                            | 0.120   | -0.0472 | 0.250 | 0.248                                         | 0.262   | -0.0541 | 0.258 | 0.255                                          | 0.447   | -0.0784 | 0.292 | 0.294 | 0.893 |
| 0.1                                                                                                                               | -0.0849  |                              | 0.219   | 0.215   | 0.259 | -0.0652                                          | 0.214   | 0.196   | 0.447 | -0.0394                                       | 0.220   | 0.193   | 0.638 | -0.0076                                        | 0.285   | 0.287   | 0.958 |       |       |
| 0.2                                                                                                                               | -0.1108  |                              | 0.201   | 0.208   | 0.377 | -0.0747                                          | 0.191   | 0.170   | 0.577 | -0.0311                                       | 0.195   | 0.159   | 0.760 | 0.0381                                         | 0.275   | 0.286   | 0.982 |       |       |
| 0.4                                                                                                                               | -0.1429  |                              | 0.175   | 0.204   | 0.544 | -0.0863                                          | 0.162   | 0.144   | 0.750 | -0.0214                                       | 0.164   | 0.119   | 0.888 | 0.1035                                         | 0.253   | 0.288   | 0.995 |       |       |
| 0.6                                                                                                                               | -0.1648  |                              | 0.153   | 0.204   | 0.694 | -0.0936                                          | 0.140   | 0.130   | 0.856 | -0.0153                                       | 0.142   | 0.092   | 0.942 | 0.1558                                         | 0.229   | 0.291   | 0.999 |       |       |
| 0.8                                                                                                                               | -0.1830  |                              | 0.133   | 0.205   | 0.816 | -0.0993                                          | 0.123   | 0.120   | 0.929 | -0.0106                                       | 0.124   | 0.066   | 0.977 | 0.2072                                         | 0.197   | 0.294   | 1     |       |       |
| 1                                                                                                                                 | -0.2042  |                              | 0.103   | 0.208   | 0.966 | -0.1054                                          | 0.104   | 0.113   | 0.992 | -0.0061                                       | 0.104   | 0.040   | 0.998 | 0.2983                                         | 0.107   | 0.301   | 1     |       |       |
| 0.6                                                                                                                               | 0        |                              | -0.0563 | 0.229   | 0.228 | 0.138                                            | -0.0656 | 0.236   | 0.239 | 0.300                                         | -0.0736 | 0.245   | 0.248 | 0.505                                          | -0.1001 | 0.278   | 0.290 | 0.932 |       |
|                                                                                                                                   | 0.1      | -0.0994                      | 0.205   | 0.209   | 0.286 | -0.0790                                          | 0.201   | 0.189   | 0.495 | -0.0530                                       | 0.208   | 0.187   | 0.700 | -0.0310                                        | 0.276   | 0.285   | 0.976 |       |       |
|                                                                                                                                   | 0.2      | -0.1230                      | 0.188   | 0.203   | 0.407 | -0.0857                                          | 0.179   | 0.166   | 0.629 | -0.0420                                       | 0.185   | 0.156   | 0.809 | 0.0144                                         | 0.269   | 0.284   | 0.990 |       |       |
|                                                                                                                                   | 0.4      | -0.1513                      | 0.163   | 0.201   | 0.583 | -0.0938                                          | 0.152   | 0.142   | 0.781 | -0.0293                                       | 0.157   | 0.118   | 0.910 | 0.0797                                         | 0.252   | 0.284   | 0.998 |       |       |
|                                                                                                                                   | 0.6      | -0.1703                      | 0.144   | 0.202   | 0.715 | -0.0985                                          | 0.133   | 0.129   | 0.873 | -0.0212                                       | 0.137   | 0.091   | 0.957 | 0.1331                                         | 0.230   | 0.287   | 1     |       |       |
|                                                                                                                                   | 0.8      | -0.1859                      | 0.127   | 0.204   | 0.829 | -0.1026                                          | 0.118   | 0.121   | 0.939 | -0.0149                                       | 0.121   | 0.067   | 0.982 | 0.1878                                         | 0.200   | 0.289   | 1     |       |       |
|                                                                                                                                   | 1        | -0.2033                      | 0.101   | 0.208   | 0.961 | -0.1067                                          | 0.102   | 0.115   | 0.991 | -0.0094                                       | 0.102   | 0.041   | 0.999 | 0.2898                                         | 0.104   | 0.292   | 1     |       |       |
|                                                                                                                                   | 1        | 0                            | -0.0695 | 0.219   | 0.226 | 0.153                                            | -0.0796 | 0.227   | 0.238 | 0.340                                         | -0.0883 | 0.235   | 0.247 | 0.554                                          | -0.1168 | 0.268   | 0.291 | 0.953 |       |
| 0.1                                                                                                                               |          | -0.1092                      | 0.195   | 0.208   | 0.310 | -0.0888                                          | 0.193   | 0.189   | 0.537 | -0.0633                                       | 0.201   | 0.188   | 0.742 | -0.0500                                        | 0.270   | 0.286   | 0.985 |       |       |
| 0.2                                                                                                                               |          | -0.1306                      | 0.179   | 0.203   | 0.433 | -0.0935                                          | 0.172   | 0.166   | 0.661 | -0.0503                                       | 0.180   | 0.157   | 0.839 | -0.0058                                        | 0.265   | 0.285   | 0.994 |       |       |
| 0.4                                                                                                                               |          | -0.1573                      | 0.156   | 0.202   | 0.601 | -0.0995                                          | 0.146   | 0.144   | 0.804 | -0.0356                                       | 0.152   | 0.120   | 0.929 | 0.0585                                         | 0.251   | 0.285   | 0.998 |       |       |
| 0.6                                                                                                                               |          | -0.1741                      | 0.138   | 0.203   | 0.734 | -0.1027                                          | 0.129   | 0.131   | 0.889 | -0.0264                                       | 0.134   | 0.094   | 0.965 | 0.1125                                         | 0.231   | 0.286   | 0.999 |       |       |
| 0.8                                                                                                                               |          | -0.1877                      | 0.123   | 0.205   | 0.839 | -0.1051                                          | 0.115   | 0.123   | 0.945 | -0.0193                                       | 0.119   | 0.071   | 0.986 | 0.1688                                         | 0.203   | 0.286   | 1     |       |       |
| 1                                                                                                                                 |          | -0.2031                      | 0.100   | 0.208   | 0.957 | -0.1081                                          | 0.101   | 0.116   | 0.990 | -0.0123                                       | 0.101   | 0.043   | 0.998 | 0.2826                                         | 0.102   | 0.285   | 1     |       |       |

**Table A14. Impact of  $\alpha_0$  and  $\omega$  on the operating characteristics for scenarios S25 to S28 (Weibull distribution for historical data / piecewise exponential distribution for new data) with a Bayesian piecewise exponential analysis (W/P/P)**

| Historical data: Weibull survival distribution / New data: piecewise exponential distribution / Bayesian piecewise exponential analysis (W/P/P) |          |                              |         |         |       |                                                  |         |         |       |                                               |         |         |       |                                               |         |         |       |       |       |
|-------------------------------------------------------------------------------------------------------------------------------------------------|----------|------------------------------|---------|---------|-------|--------------------------------------------------|---------|---------|-------|-----------------------------------------------|---------|---------|-------|-----------------------------------------------|---------|---------|-------|-------|-------|
| Treatment effect                                                                                                                                |          | S25: Null scenario<br>HR = 1 |         |         |       | S26: Disappointing effect scenario<br>HR = 0.886 |         |         |       | S27: Historical effect scenario<br>HR = 0.786 |         |         |       | S28: Anticipated effect scenario<br>HR = 0.55 |         |         |       |       |       |
| Parameters                                                                                                                                      |          | Bias                         | SD      | RMSE    | Alpha | Bias                                             | SD      | RMSE    | Power | Bias                                          | SD      | RMSE    | Power | Bias                                          | SD      | RMSE    | Power |       |       |
| $\alpha_0$                                                                                                                                      | $\omega$ | 0                            | 0       | -0.0014 | 0.274 | 0.280                                            | 0.104   | -0.0056 | 0.280 | 0.287                                         | 0.212   | -0.0087 | 0.287 | 0.292                                         | 0.345   | -0.0230 | 0.313 | 0.321 | 0.766 |
|                                                                                                                                                 |          | 0.1                          | -0.0510 | 0.249   | 0.248 | 0.217                                            | -0.0316 | 0.244   | 0.230 | 0.366                                         | -0.0065 | 0.247   | 0.226 | 0.516                                         | 0.0429  | 0.298   | 0.306 | 0.875 |       |
|                                                                                                                                                 |          | 0.2                          | -0.0810 | 0.230   | 0.235 | 0.327                                            | -0.0468 | 0.220   | 0.200 | 0.486                                         | -0.0047 | 0.220   | 0.188 | 0.643                                         | 0.0859  | 0.283   | 0.302 | 0.932 |       |
|                                                                                                                                                 |          | 0.4                          | -0.1202 | 0.200   | 0.222 | 0.508                                            | -0.0662 | 0.185   | 0.165 | 0.670                                         | -0.0034 | 0.183   | 0.142 | 0.810                                         | 0.1462  | 0.254   | 0.302 | 0.978 |       |
|                                                                                                                                                 |          | 0.6                          | -0.1481 | 0.175   | 0.216 | 0.653                                            | -0.0793 | 0.159   | 0.143 | 0.798                                         | -0.0021 | 0.155   | 0.109 | 0.897                                         | 0.1932  | 0.225   | 0.305 | 0.991 |       |
|                                                                                                                                                 |          | 0.8                          | -0.1732 | 0.148   | 0.213 | 0.794                                            | -0.0906 | 0.134   | 0.127 | 0.897                                         | -0.0009 | 0.131   | 0.078 | 0.953                                         | 0.2388  | 0.191   | 0.309 | 0.998 |       |
|                                                                                                                                                 |          | 1                            | -0.2070 | 0.102   | 0.211 | 0.972                                            | -0.1040 | 0.102   | 0.111 | 0.992                                         | -0.0005 | 0.103   | 0.038 | 0.998                                         | 0.3139  | 0.104   | 0.316 | 1     |       |
|                                                                                                                                                 |          | 0.3                          | 0       | -0.0255 | 0.241 | 0.231                                            | 0.100   | -0.0317 | 0.248 | 0.241                                         | 0.240   | -0.0366 | 0.256 | 0.248                                         | 0.416   | -0.0556 | 0.285 | 0.285 | 0.874 |
| 0.1                                                                                                                                             | -0.0750  |                              | 0.218   | 0.209   | 0.234 | -0.0540                                          | 0.213   | 0.188   | 0.417 | -0.0262                                       | 0.216   | 0.185   | 0.618 | 0.0158                                        | 0.278   | 0.279   | 0.956 |       |       |
| 0.2                                                                                                                                             | -0.1028  |                              | 0.200   | 0.202   | 0.348 | -0.0660                                          | 0.190   | 0.164   | 0.553 | -0.0203                                       | 0.191   | 0.152   | 0.740 | 0.0613                                        | 0.268   | 0.280   | 0.979 |       |       |
| 0.4                                                                                                                                             | -0.1375  |                              | 0.174   | 0.199   | 0.529 | -0.0801                                          | 0.159   | 0.139   | 0.731 | -0.0137                                       | 0.160   | 0.113   | 0.874 | 0.1246                                        | 0.245   | 0.284   | 0.995 |       |       |
| 0.6                                                                                                                                             | -0.1604  |                              | 0.153   | 0.200   | 0.676 | -0.0887                                          | 0.138   | 0.125   | 0.841 | -0.0092                                       | 0.138   | 0.085   | 0.938 | 0.1742                                        | 0.221   | 0.288   | 0.999 |       |       |
| 0.8                                                                                                                                             | -0.1800  |                              | 0.132   | 0.202   | 0.809 | -0.0959                                          | 0.120   | 0.117   | 0.923 | -0.0061                                       | 0.120   | 0.063   | 0.976 | 0.2223                                        | 0.189   | 0.294   | 1     |       |       |
| 1                                                                                                                                               | -0.2020  |                              | 0.101   | 0.206   | 0.966 | -0.1028                                          | 0.101   | 0.110   | 0.992 | -0.0030                                       | 0.101   | 0.038   | 0.998 | 0.3018                                        | 0.102   | 0.304   | 1     |       |       |
| 0.6                                                                                                                                             | 0        |                              | -0.0410 | 0.228   | 0.221 | 0.114                                            | -0.0483 | 0.235   | 0.232 | 0.268                                         | -0.0544 | 0.243   | 0.240 | 0.464                                         | -0.0766 | 0.273   | 0.281 | 0.919 |       |
|                                                                                                                                                 | 0.1      | -0.0873                      | 0.205   | 0.202   | 0.256 | -0.0663                                          | 0.200   | 0.182   | 0.462 | -0.0385                                       | 0.206   | 0.179   | 0.669 | -0.0060                                       | 0.271   | 0.277   | 0.973 |       |       |
|                                                                                                                                                 | 0.2      | -0.1133                      | 0.188   | 0.198   | 0.376 | -0.0760                                          | 0.179   | 0.160   | 0.597 | -0.0304                                       | 0.183   | 0.148   | 0.785 | 0.0391                                        | 0.264   | 0.277   | 0.989 |       |       |
|                                                                                                                                                 | 0.4      | -0.1442                      | 0.164   | 0.197   | 0.554 | -0.0865                                          | 0.151   | 0.137   | 0.759 | -0.0204                                       | 0.153   | 0.111   | 0.902 | 0.1030                                        | 0.245   | 0.280   | 0.997 |       |       |
|                                                                                                                                                 | 0.6      | -0.1649                      | 0.145   | 0.198   | 0.696 | -0.0934                                          | 0.132   | 0.125   | 0.863 | -0.0147                                       | 0.134   | 0.085   | 0.951 | 0.1540                                        | 0.223   | 0.284   | 0.999 |       |       |
|                                                                                                                                                 | 0.8      | -0.1818                      | 0.126   | 0.201   | 0.816 | -0.0983                                          | 0.116   | 0.117   | 0.932 | -0.0097                                       | 0.117   | 0.063   | 0.979 | 0.2045                                        | 0.193   | 0.289   | 1     |       |       |
|                                                                                                                                                 | 1        | -0.2006                      | 0.100   | 0.205   | 0.960 | -0.1036                                          | 0.100   | 0.111   | 0.990 | -0.0058                                       | 0.100   | 0.040   | 0.998 | 0.2938                                        | 0.101   | 0.296   | 1     |       |       |
|                                                                                                                                                 | 1        | 0                            | -0.0546 | 0.219   | 0.219 | 0.133                                            | -0.0630 | 0.226   | 0.230 | 0.305                                         | -0.0702 | 0.235   | 0.239 | 0.518                                         | -0.0949 | 0.265   | 0.282 | 0.941 |       |
| 0.1                                                                                                                                             |          | -0.0979                      | 0.196   | 0.202   | 0.282 | -0.0769                                          | 0.192   | 0.182   | 0.499 | -0.0497                                       | 0.199   | 0.180   | 0.715 | -0.0265                                       | 0.266   | 0.279   | 0.982 |       |       |
| 0.2                                                                                                                                             |          | -0.1214                      | 0.180   | 0.198   | 0.400 | -0.0841                                          | 0.171   | 0.160   | 0.627 | -0.0392                                       | 0.177   | 0.149   | 0.821 | 0.0177                                        | 0.261   | 0.279   | 0.993 |       |       |
| 0.4                                                                                                                                             |          | -0.1498                      | 0.157   | 0.197   | 0.576 | -0.0924                                          | 0.145   | 0.138   | 0.785 | -0.0274                                       | 0.150   | 0.114   | 0.918 | 0.0813                                        | 0.245   | 0.281   | 0.998 |       |       |
| 0.6                                                                                                                                             |          | -0.1687                      | 0.139   | 0.199   | 0.713 | -0.0972                                          | 0.128   | 0.126   | 0.878 | -0.0196                                       | 0.131   | 0.088   | 0.960 | 0.1333                                        | 0.225   | 0.283   | 1     |       |       |
| 0.8                                                                                                                                             |          | -0.1836                      | 0.122   | 0.201   | 0.823 | -0.1010                                          | 0.114   | 0.119   | 0.939 | -0.0140                                       | 0.116   | 0.066   | 0.983 | 0.1862                                        | 0.197   | 0.286   | 1     |       |       |
| 1                                                                                                                                               |          | -0.2003                      | 0.099   | 0.205   | 0.953 | -0.1050                                          | 0.099   | 0.113   | 0.988 | -0.0088                                       | 0.099   | 0.042   | 0.998 | 0.2867                                        | 0.100   | 0.289   | 1     |       |       |

**Table A15. Impact of  $\alpha_0$  and  $\omega$  on the operating characteristics for scenarios S29 to S32 (piecewise exponential distribution for historical data / Weibull survival distribution for new data) with a Bayesian piecewise exponential analysis (P/W/P)**

| Historical data: piecewise exponential distribution / New data: Weibull survival distribution / Bayesian piecewise exponential analysis (P/W/P) |                              |         |        |       |                                                  |         |        |       |                                               |         |        |       |                                               |         |        |       |       |
|-------------------------------------------------------------------------------------------------------------------------------------------------|------------------------------|---------|--------|-------|--------------------------------------------------|---------|--------|-------|-----------------------------------------------|---------|--------|-------|-----------------------------------------------|---------|--------|-------|-------|
| Treatment effect                                                                                                                                | S29: Null scenario<br>HR = 1 |         |        |       | S30: Disappointing effect scenario<br>HR = 0.886 |         |        |       | S31: Historical effect scenario<br>HR = 0.786 |         |        |       | S32: Anticipated effect scenario<br>HR = 0.55 |         |        |       |       |
|                                                                                                                                                 | Parameters                   | Bias    | SD     | RMSE  | Alpha                                            | Bias    | SD     | RMSE  | Power                                         | Bias    | SD     | RMSE  | Power                                         | Bias    | SD     | RMSE  | Power |
| $\alpha_0$<br>0                                                                                                                                 | $\omega$                     |         |        |       |                                                  |         |        |       |                                               |         |        |       |                                               |         |        |       |       |
|                                                                                                                                                 | 0                            | 0.0031  | 0.260  | 0.261 | 0.099                                            | 0       | 0.265  | 0.269 | 0.210                                         | -0.0032 | 0.270  | 0.274 | 0.355                                         | -0.0161 | 0.292  | 0.295 | 0.798 |
|                                                                                                                                                 | 0.1                          | -0.0493 | 0.237  | 0.234 | 0.203                                            | -0.0282 | 0.231  | 0.215 | 0.373                                         | -0.0021 | 0.232  | 0.209 | 0.550                                         | 0.0487  | 0.280  | 0.286 | 0.903 |
|                                                                                                                                                 | 0.2                          | -0.0796 | 0.220  | 0.224 | 0.315                                            | -0.0440 | 0.208  | 0.188 | 0.503                                         | -0.0016 | 0.207  | 0.174 | 0.667                                         | 0.0904  | 0.267  | 0.284 | 0.951 |
|                                                                                                                                                 | 0.4                          | -0.1189 | 0.192  | 0.215 | 0.501                                            | -0.0639 | 0.176  | 0.157 | 0.680                                         | -0.0012 | 0.173  | 0.131 | 0.805                                         | 0.1486  | 0.242  | 0.287 | 0.983 |
|                                                                                                                                                 | 0.6                          | -0.1465 | 0.168  | 0.211 | 0.653                                            | -0.0776 | 0.152  | 0.138 | 0.798                                         | -0.0010 | 0.148  | 0.101 | 0.887                                         | 0.1938  | 0.216  | 0.292 | 0.994 |
|                                                                                                                                                 | 0.8                          | -0.1707 | 0.145  | 0.209 | 0.786                                            | -0.0889 | 0.130  | 0.123 | 0.887                                         | -0.0010 | 0.127  | 0.074 | 0.955                                         | 0.2378  | 0.185  | 0.298 | 0.999 |
|                                                                                                                                                 | 1                            | -0.2033 | 0.101  | 0.207 | 0.966                                            | -0.1020 | 0.102  | 0.110 | 0.990                                         | 0       | 0.102  | 0.040 | 0.998                                         | 0.3090  | 0.103  | 0.311 | 1     |
| 0.3                                                                                                                                             | 0                            | 0.0040  | 0.230  | 0.210 | 0.070                                            | 0.0020  | 0.236  | 0.217 | 0.189                                         | 0.0005  | 0.242  | 0.224 | 0.378                                         | -0.0051 | 0.267  | 0.250 | 0.873 |
|                                                                                                                                                 | 0.1                          | -0.0525 | 0.212  | 0.193 | 0.186                                            | -0.0299 | 0.203  | 0.169 | 0.381                                         | 0.0012  | 0.203  | 0.163 | 0.591                                         | 0.0645  | 0.258  | 0.252 | 0.958 |
|                                                                                                                                                 | 0.2                          | -0.0838 | 0.197  | 0.189 | 0.292                                            | -0.0466 | 0.182  | 0.148 | 0.516                                         | 0.0014  | 0.180  | 0.132 | 0.711                                         | 0.1072  | 0.246  | 0.257 | 0.982 |
|                                                                                                                                                 | 0.4                          | -0.1222 | 0.173  | 0.188 | 0.482                                            | -0.0659 | 0.154  | 0.127 | 0.700                                         | 0.0016  | 0.150  | 0.097 | 0.852                                         | 0.1643  | 0.223  | 0.268 | 0.995 |
|                                                                                                                                                 | 0.6                          | -0.1478 | 0.153  | 0.190 | 0.638                                            | -0.0780 | 0.135  | 0.115 | 0.823                                         | 0.0019  | 0.131  | 0.074 | 0.925                                         | 0.2068  | 0.199  | 0.278 | 0.999 |
|                                                                                                                                                 | 0.8                          | -0.1693 | 0.132  | 0.193 | 0.777                                            | -0.0873 | 0.119  | 0.109 | 0.908                                         | 0.0022  | 0.116  | 0.056 | 0.971                                         | 0.2461  | 0.170  | 0.288 | 1     |
|                                                                                                                                                 | 1                            | -0.1940 | 0.100  | 0.198 | 0.951                                            | -0.0961 | 0.100  | 0.104 | 0.988                                         | 0.0027  | 0.101  | 0.039 | 0.998                                         | 0.3030  | 0.101  | 0.305 | 1     |
|                                                                                                                                                 | 0.6                          | 0       | 0.0081 | 0.217 | 0.195                                            | 0.062   | 0.0075 | 0.224 | 0.201                                         | 0.180   | 0.0076 | 0.231 | 0.209                                         | 0.376   | 0.0056 | 0.256 | 0.236 |
| 0.1                                                                                                                                             |                              | -0.0488 | 0.202  | 0.181 | 0.170                                            | -0.0264 | 0.192  | 0.157 | 0.378                                         | 0.0066  | 0.192  | 0.150 | 0.599                                         | 0.0754  | 0.247  | 0.243 | 0.969 |
| 0.2                                                                                                                                             |                              | -0.0801 | 0.189  | 0.179 | 0.280                                            | -0.0437 | 0.173  | 0.138 | 0.518                                         | 0.0059  | 0.170  | 0.122 | 0.729                                         | 0.1173  | 0.236  | 0.251 | 0.987 |
| 0.4                                                                                                                                             |                              | -0.1182 | 0.167  | 0.181 | 0.464                                            | -0.0632 | 0.147  | 0.119 | 0.701                                         | 0.0052  | 0.143  | 0.089 | 0.862                                         | 0.1723  | 0.213  | 0.264 | 0.998 |
| 0.6                                                                                                                                             |                              | -0.1437 | 0.148  | 0.184 | 0.618                                            | -0.0750 | 0.130  | 0.110 | 0.820                                         | 0.0050  | 0.125  | 0.069 | 0.927                                         | 0.2126  | 0.190  | 0.275 | 0.999 |
| 0.8                                                                                                                                             |                              | -0.1648 | 0.129  | 0.187 | 0.766                                            | -0.0840 | 0.115  | 0.104 | 0.906                                         | 0.0048  | 0.112  | 0.053 | 0.969                                         | 0.2495  | 0.163  | 0.286 | 1     |
| 1                                                                                                                                               |                              | -0.1885 | 0.099  | 0.193 | 0.940                                            | -0.0922 | 0.099  | 0.100 | 0.983                                         | 0.0049  | 0.100  | 0.039 | 0.998                                         | 0.3009  | 0.100  | 0.303 | 1     |
| 1                                                                                                                                               |                              | 0       | 0.0131 | 0.208 | 0.187                                            | 0.057   | 0.0138 | 0.215 | 0.192                                         | 0.174   | 0.0153 | 0.222 | 0.201                                         | 0.376   | 0.0158 | 0.249 | 0.230 |
|                                                                                                                                                 | 0.1                          | -0.0438 | 0.196  | 0.175 | 0.161                                            | -0.0218 | 0.185  | 0.151 | 0.372                                         | 0.0123  | 0.184  | 0.145 | 0.607                                         | 0.0849  | 0.240  | 0.240 | 0.972 |
|                                                                                                                                                 | 0.2                          | -0.0748 | 0.184  | 0.174 | 0.266                                            | -0.0397 | 0.167  | 0.133 | 0.513                                         | 0.0106  | 0.163  | 0.117 | 0.731                                         | 0.1259  | 0.228  | 0.249 | 0.989 |
|                                                                                                                                                 | 0.4                          | -0.1131 | 0.163  | 0.176 | 0.450                                            | -0.0595 | 0.143  | 0.115 | 0.696                                         | 0.0090  | 0.138  | 0.086 | 0.861                                         | 0.1789  | 0.206  | 0.264 | 0.998 |
|                                                                                                                                                 | 0.6                          | -0.1387 | 0.146  | 0.179 | 0.595                                            | -0.0717 | 0.127  | 0.107 | 0.815                                         | 0.0081  | 0.122  | 0.067 | 0.927                                         | 0.2174  | 0.184  | 0.275 | 0.999 |
|                                                                                                                                                 | 0.8                          | -0.1598 | 0.128  | 0.183 | 0.741                                            | -0.0806 | 0.114  | 0.101 | 0.900                                         | 0.0075  | 0.110  | 0.053 | 0.970                                         | 0.2521  | 0.158  | 0.285 | 1     |
|                                                                                                                                                 | 1                            | -0.1840 | 0.099  | 0.188 | 0.922                                            | -0.0889 | 0.099  | 0.098 | 0.979                                         | 0.0072  | 0.099  | 0.041 | 0.997                                         | 0.2999  | 0.100  | 0.302 | 1     |

**Table A16. Impact of  $\alpha_0$  and  $\omega$  on the operating characteristics for scenarios S29 to S32 (piecewise exponential distribution for historical data / Weibull survival distribution for new data) with a Bayesian Weibull analysis (P/W/W)**

| Historical data: piecewise exponential distribution / New data: Weibull survival distribution / Bayesian Weibull analysis (P/W/W) |               |                              |        |       |       |                                                  |        |       |       |                                               |        |       |       |                                               |        |       |       |
|-----------------------------------------------------------------------------------------------------------------------------------|---------------|------------------------------|--------|-------|-------|--------------------------------------------------|--------|-------|-------|-----------------------------------------------|--------|-------|-------|-----------------------------------------------|--------|-------|-------|
| Treatment effect                                                                                                                  |               | S29: Null scenario<br>HR = 1 |        |       |       | S30: Disappointing effect scenario<br>HR = 0.886 |        |       |       | S31: Historical effect scenario<br>HR = 0.786 |        |       |       | S32: Anticipated effect scenario<br>HR = 0.55 |        |       |       |
| Parameters                                                                                                                        |               | Bias                         | SD     | RMSE  | Alpha | Bias                                             | SD     | RMSE  | Power | Bias                                          | SD     | RMSE  | Power | Bias                                          | SD     | RMSE  | Power |
| $\alpha_0$<br>0                                                                                                                   | $\omega$<br>0 | 0.0032                       | 0.262  | 0.257 | 0.098 | 0.0009                                           | 0.268  | 0.266 | 0.208 | 0.0004                                        | 0.275  | 0.276 | 0.347 | -0.0084                                       | 0.275  | 0.294 | 0.793 |
|                                                                                                                                   | 0.1           | -0.0498                      | 0.239  | 0.231 | 0.204 | -0.0273                                          | 0.233  | 0.212 | 0.376 | -0.0010                                       | 0.235  | 0.211 | 0.529 | 0.0548                                        | 0.288  | 0.284 | 0.898 |
|                                                                                                                                   | 0.2           | -0.0807                      | 0.222  | 0.221 | 0.313 | -0.0436                                          | 0.210  | 0.185 | 0.500 | -0.0007                                       | 0.210  | 0.176 | 0.658 | 0.0966                                        | 0.272  | 0.284 | 0.949 |
|                                                                                                                                   | 0.4           | -0.1199                      | 0.194  | 0.212 | 0.499 | -0.0637                                          | 0.178  | 0.154 | 0.684 | -0.0007                                       | 0.176  | 0.133 | 0.806 | 0.1548                                        | 0.244  | 0.287 | 0.983 |
|                                                                                                                                   | 0.6           | -0.1476                      | 0.171  | 0.209 | 0.652 | -0.0776                                          | 0.155  | 0.135 | 0.798 | -0.0006                                       | 0.151  | 0.102 | 0.898 | 0.1996                                        | 0.218  | 0.293 | 0.995 |
|                                                                                                                                   | 0.8           | -0.1714                      | 0.147  | 0.208 | 0.788 | -0.0890                                          | 0.133  | 0.122 | 0.889 | -0.0003                                       | 0.131  | 0.074 | 0.959 | 0.2422                                        | 0.186  | 0.299 | 0.999 |
|                                                                                                                                   | 1             | -0.2033                      | 0.105  | 0.207 | 0.968 | -0.1018                                          | 0.106  | 0.109 | 0.989 | 0                                             | 0.107  | 0.039 | 0.998 | 0.3099                                        | 0.110  | 0.312 | 1     |
|                                                                                                                                   | 0.3           | 0                            | 0.0065 | 0.232 | 0.208 | 0.067                                            | 0.0054 | 0.238 | 0.215 | 0.183                                         | 0.0068 | 0.245 | 0.227 | 0.354                                         | 0      | 0.273 | 0.249 |
| 0.1                                                                                                                               |               | -0.0505                      | 0.214  | 0.191 | 0.181 | -0.0275                                          | 0.205  | 0.168 | 0.375 | 0.0047                                        | 0.205  | 0.166 | 0.572 | 0.0680                                        | 0.261  | 0.252 | 0.955 |
| 0.2                                                                                                                               |               | -0.0823                      | 0.199  | 0.188 | 0.287 | -0.0446                                          | 0.184  | 0.147 | 0.509 | 0.0041                                        | 0.182  | 0.136 | 0.705 | 0.1109                                        | 0.248  | 0.258 | 0.980 |
| 0.4                                                                                                                               |               | -0.1210                      | 0.175  | 0.187 | 0.477 | -0.0647                                          | 0.156  | 0.126 | 0.695 | 0.0037                                        | 0.153  | 0.100 | 0.851 | 0.1678                                        | 0.223  | 0.269 | 0.995 |
| 0.6                                                                                                                               |               | -0.1469                      | 0.155  | 0.189 | 0.637 | -0.0770                                          | 0.137  | 0.115 | 0.818 | 0.0034                                        | 0.133  | 0.076 | 0.927 | 0.2100                                        | 0.198  | 0.279 | 0.999 |
| 0.8                                                                                                                               |               | -0.1687                      | 0.135  | 0.192 | 0.776 | -0.0865                                          | 0.121  | 0.108 | 0.907 | 0.0034                                        | 0.118  | 0.057 | 0.968 | 0.2486                                        | 0.169  | 0.289 | 1     |
| 1                                                                                                                                 |               | -0.1934                      | 0.102  | 0.197 | 0.951 | -0.0954                                          | 0.103  | 0.103 | 0.987 | 0.0033                                        | 0.103  | 0.039 | 0.998 | 0.3036                                        | 0.105  | 0.306 | 1     |
| 0.6                                                                                                                               |               | 0                            | 0.0106 | 0.219 | 0.194 | 0.063                                            | 0.0102 | 0.225 | 0.201 | 0.176                                         | 0.0124 | 0.232 | 0.213 | 0.362                                         | 0.0074 | 0.260 | 0.237 |
|                                                                                                                                   | 0.1           | -0.0465                      | 0.204  | 0.181 | 0.171 | -0.0245                                          | 0.193  | 0.157 | 0.372 | 0.0093                                        | 0.193  | 0.155 | 0.589 | 0.0758                                        | 0.249  | 0.244 | 0.969 |
|                                                                                                                                   | 0.2           | -0.0783                      | 0.190  | 0.179 | 0.275 | -0.0421                                          | 0.174  | 0.138 | 0.514 | 0.0081                                        | 0.171  | 0.126 | 0.717 | 0.1176                                        | 0.237  | 0.252 | 0.987 |
|                                                                                                                                   | 0.4           | -0.1168                      | 0.169  | 0.180 | 0.463 | -0.0621                                          | 0.149  | 0.119 | 0.697 | 0.0067                                        | 0.145  | 0.093 | 0.861 | 0.1727                                        | 0.214  | 0.266 | 0.998 |
|                                                                                                                                   | 0.6           | -0.1425                      | 0.150  | 0.183 | 0.612 | -0.0742                                          | 0.132  | 0.109 | 0.821 | 0.0062                                        | 0.127  | 0.072 | 0.928 | 0.2131                                        | 0.190  | 0.276 | 0.999 |
|                                                                                                                                   | 0.8           | -0.1639                      | 0.131  | 0.187 | 0.762 | -0.0833                                          | 0.117  | 0.103 | 0.904 | 0.0058                                        | 0.114  | 0.055 | 0.971 | 0.2496                                        | 0.163  | 0.286 | 1     |
|                                                                                                                                   | 1             | -0.1880                      | 0.101  | 0.192 | 0.939 | -0.0917                                          | 0.101  | 0.100 | 0.983 | 0.0058                                        | 0.102  | 0.040 | 0.995 | 0.3008                                        | 0.103  | 0.303 | 1     |
|                                                                                                                                   | 1             | 0                            | 0.0145 | 0.209 | 0.188 | 0.058                                            | 0.0148 | 0.216 | 0.193 | 0.176                                         | 0.0175 | 0.223 | 0.207 | 0.369                                         | 0.0138 | 0.251 | 0.231 |
| 0.1                                                                                                                               |               | -0.0421                      | 0.197  | 0.176 | 0.160 | -0.0210                                          | 0.186  | 0.151 | 0.370 | 0.0133                                        | 0.186  | 0.149 | 0.594 | 0.0815                                        | 0.241  | 0.241 | 0.973 |
| 0.2                                                                                                                               |               | -0.0734                      | 0.185  | 0.174 | 0.267 | -0.0389                                          | 0.168  | 0.133 | 0.514 | 0.0114                                        | 0.165  | 0.122 | 0.724 | 0.1224                                        | 0.230  | 0.250 | 0.989 |
| 0.4                                                                                                                               |               | -0.1118                      | 0.165  | 0.176 | 0.445 | -0.0590                                          | 0.145  | 0.116 | 0.692 | 0.0095                                        | 0.140  | 0.090 | 0.862 | 0.1757                                        | 0.208  | 0.264 | 0.998 |
| 0.6                                                                                                                               |               | -0.1375                      | 0.148  | 0.179 | 0.593 | -0.0712                                          | 0.129  | 0.107 | 0.813 | 0.0085                                        | 0.124  | 0.071 | 0.926 | 0.2145                                        | 0.185  | 0.275 | 0.999 |
| 0.8                                                                                                                               |               | -0.1590                      | 0.129  | 0.183 | 0.739 | -0.0803                                          | 0.115  | 0.101 | 0.899 | 0.0078                                        | 0.112  | 0.055 | 0.968 | 0.2498                                        | 0.159  | 0.285 | 1     |
| 1                                                                                                                                 |               | -0.1836                      | 0.100  | 0.188 | 0.920 | -0.0887                                          | 0.100  | 0.097 | 0.978 | 0.0076                                        | 0.100  | 0.041 | 0.995 | 0.2988                                        | 0.101  | 0.301 | 1     |
